# Supplementary material for: Evolution of the Polyphenol and Terpene Content, Antioxidant Activity and Plant Morphology of Eight Different Fiber-Type Cultivars of Cannabis sativa L. Cultivated at Three Sowing Densities
Source: PubMed Central journal article supplement (PMC7763896; doi:10.3390/plants9121740), 2020-12-09
Supplement: plants-09-01740-s001.pdf [file plants-09-01740-s001.pdf]

# Evolution of the polyphenol and terpene content, antioxidant activity and plant morphology during the ripening of eight different fiber-type cultivars of *Cannabis sativa* L., and influence of the sowing density

Amandine André \*, Marianne Leupin, Markus Kneubühl, Vasilisa Pedan and Irene Chetschik

Zurich University of Applied Sciences, Life Sciences and Facility Management, 8820 Wädenswil, Switzerland

|                                                                                                                                                                                                       |    |
|-------------------------------------------------------------------------------------------------------------------------------------------------------------------------------------------------------|----|
| Table S 1. Morphological parameters of the different cultivars sowed at densities: 30, 150 and 300 seeds/m <sup>2</sup> .....                                                                         | 3  |
| Table S 2. Correlation matrix with Pearson coefficient values for the total phenolic content (TPC), the different identified flavonoids and the antioxidant activity (AOX) of the hemp extracts. .... | 6  |
| Table S 3. Maximum absorbance wavelength of reference compounds, and compounds identified in the different hemp cultivars. ....                                                                       | 16 |
| Table S 4. Flavonoid composition of Fedora 17 density 150. Data are presented as mean ± SD in mg/g DW. ....                                                                                           | 19 |
| Table S 5. Flavonoid composition of Felina 32 density 300 and 150 seeds/m <sup>2</sup> . Data are presented as mean ± SD in mg/g DW .....                                                             | 20 |
| Table S 6. Flavonoid composition of KC Virtus density 30 seeds/m <sup>2</sup> male and female inflorescences. Data are presented as mean ± SD in mg/g DW.....                                         | 21 |
| Table S 7. Flavonoid composition of KC Virtus density 150 seeds/m <sup>2</sup> male and female inflorescences. Data are presented as mean ± SD in mg/g DW.....                                        | 22 |
| Table S 8. Flavonoid composition of KC Virtus density 300 seeds/m <sup>2</sup> male and female inflorescences. Data are presented as mean ± SD in mg/g DW.....                                        | 23 |
| Table S 9. Flavonoid composition of Fibror 79 density 300, 150 and 30 seeds/m <sup>2</sup> inflorescences. Data are presented as mean ± SD in mg/g DW.....                                            | 24 |
| Table S 10. Flavonoid composition of Santhica 27 density 300 seeds/m <sup>2</sup> inflorescences. Data are presented as mean ± SD in mg/g DW.....                                                     | 26 |
| Table S 11. Flavonoid composition of Futura 75 density 300 and 150 seeds/m <sup>2</sup> inflorescences. Data are presented as mean ± SD in mg/g DW .....                                              | 27 |
| Table S 12. Flavonoid composition of Santhica 70 density 300 seeds/m <sup>2</sup> inflorescences. Data are presented as mean ± SD in mg/g DW.....                                                     | 28 |
| Table S 13. Flavonoid composition of Finola density 300 and 150 seeds/m <sup>2</sup> , male and female inflorescences. Data are presented as mean ± SD in mg/g DW.....                                | 29 |
| Table S 14. Qualitative analysis of the different terpenes found in 8 different hemp varieties .....                                                                                                  | 30 |

Table S 15. Terpene composition of different hemp cultivars sowed at different densities and harvested at different dates. Data are expressed as mean  $\pm$  SD in mg/kg FW, flowering stages are indicated by the letters: a = early flowering, b = full flowering, c = end of flowering..... 31

|                                                                                                                                                        |    |
|--------------------------------------------------------------------------------------------------------------------------------------------------------|----|
| Figure S 1. MS/MS spectra of Quercetin-O-sophoroside (1), CEV = 30 eV, $[M+H]^+$ = 627.1565. 7                                                         |    |
| Figure S 2. MS/MS spectra of Isoorientin-2''-O-glucoside (2), CEV = 30 eV, $[M+H]^+$ = 611.1613                                                        | 8  |
| .....                                                                                                                                                  |    |
| Figure S 3. MS/MS spectra of Luteolin-C-glucoside (3), CEV = 30 eV, $[M+H]^+$ = 449.1088.....                                                          | 9  |
| Figure S 4. MS/MS spectra of Luteolin-C-hexoside-O-rhamnoside (4), CEV = 30 eV, $[M+H]^+$ = 595.1665.....                                              | 10 |
| Figure S 5. MS/MS spectra of Kaempferol-O-sophoroside (5), CEV = 30 eV, $[M+H]^+$ = 611.1613                                                           | 11 |
| .....                                                                                                                                                  |    |
| Figure S 6. MS/MS spectra of Vitexin-2''-O-glucoside (6), CEV = 30 eV, $[M+H]^+$ = 595.1665...                                                         | 12 |
| Figure S 7. MS/MS spectra of Vitexin-2''-O-rhamnoside (7), CEV = 30 eV, $[M+H]^+$ = 579.171713                                                         |    |
| Figure S 8. MS/MS spectra of Luteolin-7-O-glucuronide (8), CEV = 30 eV, $[M+H]^+$ = 463.0884                                                           | 14 |
| .....                                                                                                                                                  |    |
| Figure S 9. MS/MS spectra of Apigenin-4'-methoxy-7-glucuronide (12), CEV = 45 eV, $[M+H]^+$ = 461.1084.....                                            | 15 |
| Figure S 10. UV spectra of compound 3 (luteolin-C-glucoside), in comparison with UV spectra of Luteolin (blue) and Kaempferol (brown).....             | 17 |
| Figure S 11. UV spectra of compound 4 (luteolin-C-hexoside-O-rhamnoside), in comparison with UV spectra of Luteolin (blue) and Kaempferol (brown)..... | 18 |

**Table 1.** Morphological parameters of the different cultivars sowed at densities: 30, 150 and 300 seeds/m<sup>2</sup>.

| Cultivar, Harvest Date and Flowering Stage                                                         | 30 Seeds/m <sup>2</sup> |           |        |                  |                    | 150 Seeds/m <sup>2</sup> |           |        |                  |                    | 300 Seeds/m <sup>2</sup> |           |        |                  |                    |
|----------------------------------------------------------------------------------------------------|-------------------------|-----------|--------|------------------|--------------------|--------------------------|-----------|--------|------------------|--------------------|--------------------------|-----------|--------|------------------|--------------------|
|                                                                                                    | % leaves                | % flowers | % stem | Stem length (cm) | Stem diameter (cm) | % leaves                 | % flowers | % stem | Stem length (cm) | Stem diameter (cm) | % leaves                 | % flowers | % stem | Stem length (cm) | Stem diameter (cm) |
| <b>KC Virtus</b>  |                         |           |        |                  |                    |                          |           |        |                  |                    |                          |           |        |                  |                    |
| 22.07.2019 <i>early flowering</i>                                                                  |                         |           |        |                  |                    | 16.9                     | 14.8      | 65     | 163.24 (a)       | 10.05 (a)          | 17.1                     | 12.4      | 66.49  | 108.71 (b)       | 5.84 (b)           |
| 13.08.2019                                                                                         |                         |           |        |                  |                    | 15.1                     | 18        | 66.91  | 144.54 (c)       | nd                 | 11.2                     | 14.4      | 68.1   | 114.53 (d)       | nd                 |
| 27.08.2019                                                                                         | 16.7                    | 26.4      | 53.33  | 105.5 (e)        |                    | 13                       | 14.1      | 70     | 124.58 (f)       | nd                 | 12.8                     | 15.3      | 70.7   | 145.75 (g)       | nd                 |
| 10.09.2019 <i>full flowering</i>                                                                   | 11.1                    | 47.2      | 39.69  | 173.9 (h)        | 11.13              | 9.7                      | 35.8      | 52.41  | 188.24 (h)       | 10.45              | 7.1                      | 31.6      | 59.19  | 189.5 (h)        | 9.18               |
| <b>Finola</b>                                                                                      |                         |           |        |                  |                    |                          |           |        |                  |                    |                          |           |        |                  |                    |
| 02.07.2019 <i>full flowering</i>                                                                   |                         |           |        |                  |                    |                          | 61.2      | 28.7   | 65.5 (i)         | 4.05 (i)           |                          | 61.4      | 34.6   | 60.4 (j)         | 3.84 (j)           |
| 16.07.2019 <i>end of flowering</i>                                                                 |                         |           |        |                  |                    |                          | 68.6      | 25.4   | 63.8 (k)         | 4.45 (k)           |                          | 67.7      | 27.3   | 56.7 (l)         | 3.53 (l)           |
| 30.07.2019                                                                                         |                         | 65.88     | 21.42  | 72.8             | 5.39               |                          | 68.8      | 32.98  | 99.94 (h)        | 5.91 (h)           |                          | 65.33     | 27.2   | 66.48 (h)        | 4.25 (h)           |
| 11.08.2019                                                                                         | 1.66                    | 61.59     | 27.35  | 98.5             |                    | 5.1                      | 60.82     | 25.2   | 86.41            |                    | 2.88                     | 64.84     | 28.77  | 89               |                    |
| 25.08.2019                                                                                         | 0.87                    | 60.52     | 35.83  | 87.11            |                    | 3.07                     | 55.98     | 38.14  | 92.67            |                    | 2.24                     | 52.34     | 37.9   | 95.04            |                    |
| <b>Felina 32</b>                                                                                   |                         |           |        |                  |                    |                          |           |        |                  |                    |                          |           |        |                  |                    |
| 22.07.2019 <i>early flowering</i>                                                                  |                         |           |        |                  |                    | 13.9                     | 19.7      | 65.68  | 168.1            | 8.21               | 13.3                     | 20.1      | 62.29  | 135.95           | 5.76               |
| 13.08.2019 <i>full flowering</i>                                                                   |                         |           |        |                  |                    | 16.1                     | 30        | 53.9   | 158.16           |                    | 10.9                     | 27.5      | 58.7   | 121.47           |                    |

|                                    |      |      |           |        |      |      |      |           |        |      |      |      |           |        |       |
|------------------------------------|------|------|-----------|--------|------|------|------|-----------|--------|------|------|------|-----------|--------|-------|
| 27.08.2019 <i>end of flowering</i> | 13.7 | 38.6 | 45.4      | 127.05 |      | 14   | 33.3 | 50.<br>4  | 176.75 |      | 10.7 | 31.8 | 54.<br>6  | 158.65 |       |
| 10.09.2019                         | 7    | 54.4 | 37.6      | 179.6  | 9.9  | 6.4  | 30.5 | 60.<br>5  | 181.28 | 7.06 | 4.8  | 31.2 | 61        | 175.44 | 7.23  |
| <b>Futura75</b>                    |      |      |           |        |      |      |      |           |        |      |      |      |           |        |       |
| 22.07.2019 <i>early flowering</i>  |      |      |           |        |      | 15.2 | 19.2 | 60.<br>38 | 181.05 | 9.73 | 11.4 | 13.6 | 74.<br>04 | 141.52 | 5.91  |
| 13.08.2019 <i>early flowering</i>  |      |      |           |        |      | 16.4 | 21.2 | 62.<br>38 | 175.44 |      | 10.1 | 19.3 | 66.<br>67 | 123.51 |       |
| 27.08.2019 <i>full flowering</i>   | 13.8 | 32.4 | 50.9<br>8 | 122.79 |      | 12.2 | 26.8 | 59.<br>38 | 167.14 |      | 9.9  | 23.9 | 64.<br>35 | 166.95 |       |
| 10.09.2019 <i>end of flowering</i> | 2.7  | 39   | 56.2<br>5 | 180.4  | 10.3 | 3.8  | 25.2 | 68.<br>46 | 181.12 | 7.14 | 1.5  | 25   | 70.<br>55 | 192.88 | 9.07  |
| <b>Fibror 79</b>                   |      |      |           |        |      |      |      |           |        |      |      |      |           |        |       |
| 22.07.2019 <i>early flowering</i>  |      |      |           |        |      | 14.5 | 13.8 | 68.<br>49 | 154.75 | 7.54 | 12.4 | 13.1 | 72.<br>96 | 146.67 | 6.28  |
| 13.08.2019                         |      |      |           |        |      | 17   | 18.7 | 59.<br>48 | 160    |      | 11.2 | 17.7 | 68.<br>99 | 124    |       |
| 27.08.2019                         | 13.8 | 28.5 | 54.7<br>7 | 140    |      | 14.8 | 21.6 | 62.<br>1  | 174    |      | 15   | 19   | 63.<br>8  | 150    |       |
| 10.09.2019 <i>full flowering</i>   | 10.8 | 36.7 | 49.2<br>3 | 191    | 12.9 | 9.5  | 27.8 | 60.<br>2  | 199    | 9.2  | 9.1  | 33.6 | 55.<br>33 | 196.95 | 10.15 |
| <b>Fedora 17</b>                   |      |      |           |        |      |      |      |           |        |      |      |      |           |        |       |
| 22.07.2019 <i>early flowering</i>  |      |      |           |        |      | 16.6 | 25.5 | 53.<br>4  | 141    | 7.67 |      |      |           |        |       |
| 13.08.2019 <i>full flowering</i>   |      |      |           |        |      | 9.3  | 36.9 | 49.<br>9  | 153.9  |      |      |      |           |        |       |
| 27.08.2019 <i>end of flowering</i> |      |      |           |        |      | 8.1  | 37.3 | 51.<br>8  | 168    |      |      |      |           |        |       |
| 10.09.2019                         |      |      |           |        |      | 7.3  | 43.7 | 46.<br>85 | 176.4  | 9.67 |      |      |           |        |       |
| <b>Santhica 27</b>                 |      |      |           |        |      |      |      |           |        |      |      |      |           |        |       |

|                                    |      |      |           |        |      |
|------------------------------------|------|------|-----------|--------|------|
| 22.07.2019 <i>early flowering</i>  | 13.2 | 16.5 | 63.<br>87 | 161.8  | 7.66 |
| 13.08.2019 <i>full flowering</i>   | 13.3 | 22.8 | 63.<br>8  | 146.3  |      |
| 27.08.2019                         | 9.9  | 26   | 61.<br>7  | 172.2  |      |
| 10.09.2019 <i>end of flowering</i> | 3.2  | 23.6 | 70.<br>6  | 187.6  | 7.4  |
| <hr/>                              |      |      |           |        |      |
| <b>Santhica 70</b>                 |      |      |           |        |      |
| 22.07.2019 <i>early flowering</i>  | 14.4 | 15.9 | 66.<br>9  | 167.3  | 9.13 |
| 13.08.2019 <i>full flowering</i>   | 14.2 | 19.5 | 66.<br>37 | 159    |      |
| 27.08.2019                         | 11.3 | 23.2 | 63.<br>64 | 155.38 |      |
| 10.09.2019 <i>end of flowering</i> | 4.6  | 18.1 | 75.<br>2  | 176.92 | 7.04 |
| <hr/>                              |      |      |           |        |      |

**Table 2.** Correlation matrix with Pearson coefficient values for the total phenolic content (TPC), the different identified flavonoids and the antioxidant activity (AOX) of the hemp extracts.

| Parameters                         | Q-soph | I-gluc | L-gluc | L-hex-rhamn | K-soph | V-gluc | V-rhamn | L-glucu | A-glucu | C-glucu-1 | C-glucu-2 | A-meth-glucu | Lut   | Api   | Chryso | TPC   | AOX   |
|------------------------------------|--------|--------|--------|-------------|--------|--------|---------|---------|---------|-----------|-----------|--------------|-------|-------|--------|-------|-------|
| Quercetine-O-sophoroside           | 1      | 0.19   | 0.12   | 0.10        | 0.97*  | 0.20   | 0.14    | 0.08    | -0.01   | 0.18      | 0.33*     | -0.12        | 0.12  | 0.41* | 0.07   | 0.13  | 0.13  |
| Isoorientin-2''-O-glucoside        |        | 1      | 0.93*  | 0.91*       | 0.18   | 0.90*  | 0.80*   | 0.85*   | 0.59*   | 0.70*     | 0.26      | 0.24         | -0.16 | -0.03 | -0.13  | 0.73* | 0.76* |
| Luteolin-C-glucoside               |        |        | 1      | 0.85*       | 0.12   | 0.90*  | 0.85*   | 0.85*   | 0.68*   | 0.74*     | 0.33*     | 0.31*        | -0.10 | -0.01 | -0.08  | 0.70* | 0.72* |
| Luteolin-C-hexoside-O-rhamnoside   |        |        |        | 1           | 0.08   | 0.79*  | 0.86*   | 0.91*   | 0.66*   | 0.73*     | 0.16      | 0.33*        | -0.16 | -0.09 | -0.12  | 0.77* | 0.81* |
| Kaempferol-O-sophoroside           |        |        |        |             | 1      | 0.19   | 0.13    | 0.07    | -0.02   | 0.17      | 0.33*     | -0.12        | 0.23  | 0.55* | 0.15   | 0.12  | 0.12  |
| Vitexin-2''-O-glucoside            |        |        |        |             |        | 1      | 0.91*   | 0.84*   | 0.77*   | 0.76*     | 0.46*     | 0.14         | -0.12 | 0.00  | -0.10  | 0.67* | 0.67* |
| Vitexin-2''-O-rhamnoside           |        |        |        |             |        |        | 1       | 0.89    | 0.87*   | 0.81*     | 0.38*     | 0.25         | -0.07 | 0.00  | -0.06  | 0.69* | 0.70* |
| Luteolin-7-O-glucuronide           |        |        |        |             |        |        |         | 1       | 0.87*   | 0.86*     | 0.34*     | 0.30*        | -0.18 | -0.10 | -0.13  | 0.80* | 0.81* |
| Apigenin-7-O-glucuronide           |        |        |        |             |        |        |         |         | 1       | 0.83*     | 0.45*     | 0.19         | -0.17 | -0.12 | -0.13  | 0.65* | 0.63* |
| Chrysoeriol-O-glucuronide isomer 1 |        |        |        |             |        |        |         |         |         | 1         | 0.25      | 0.17         | -0.15 | -0.06 | -0.12  | 0.75* | 0.71* |
| Chrysoeriol-O-glucuronide isomer 2 |        |        |        |             |        |        |         |         |         |           | 1         | -0.24        | 0.08  | 0.16  | 0.03   | 0.25  | 0.26  |
| Apigenin-4'-methoxy-7-glucuronide  |        |        |        |             |        |        |         |         |         |           |           | 1            | -0.09 | -0.10 | -0.06  | 0.13  | 0.09  |
| Luteolin                           |        |        |        |             |        |        |         |         |         |           |           |              | 1     | 0.89* | 0.87*  | -0.18 | -0.21 |
| Apigenin                           |        |        |        |             |        |        |         |         |         |           |           |              |       | 1.00  | 0.80*  | -0.10 | -0.12 |
| Chrysoeriol                        |        |        |        |             |        |        |         |         |         |           |           |              |       |       | 1.00   | -0.19 | -0.20 |
| TPC                                |        |        |        |             |        |        |         |         |         |           |           |              |       |       |        | 1.00  | 0.96* |
| AOX                                |        |        |        |             |        |        |         |         |         |           |           |              |       |       |        |       | 1.00  |

\*Correlation is significant at  $p < 0.05$ .

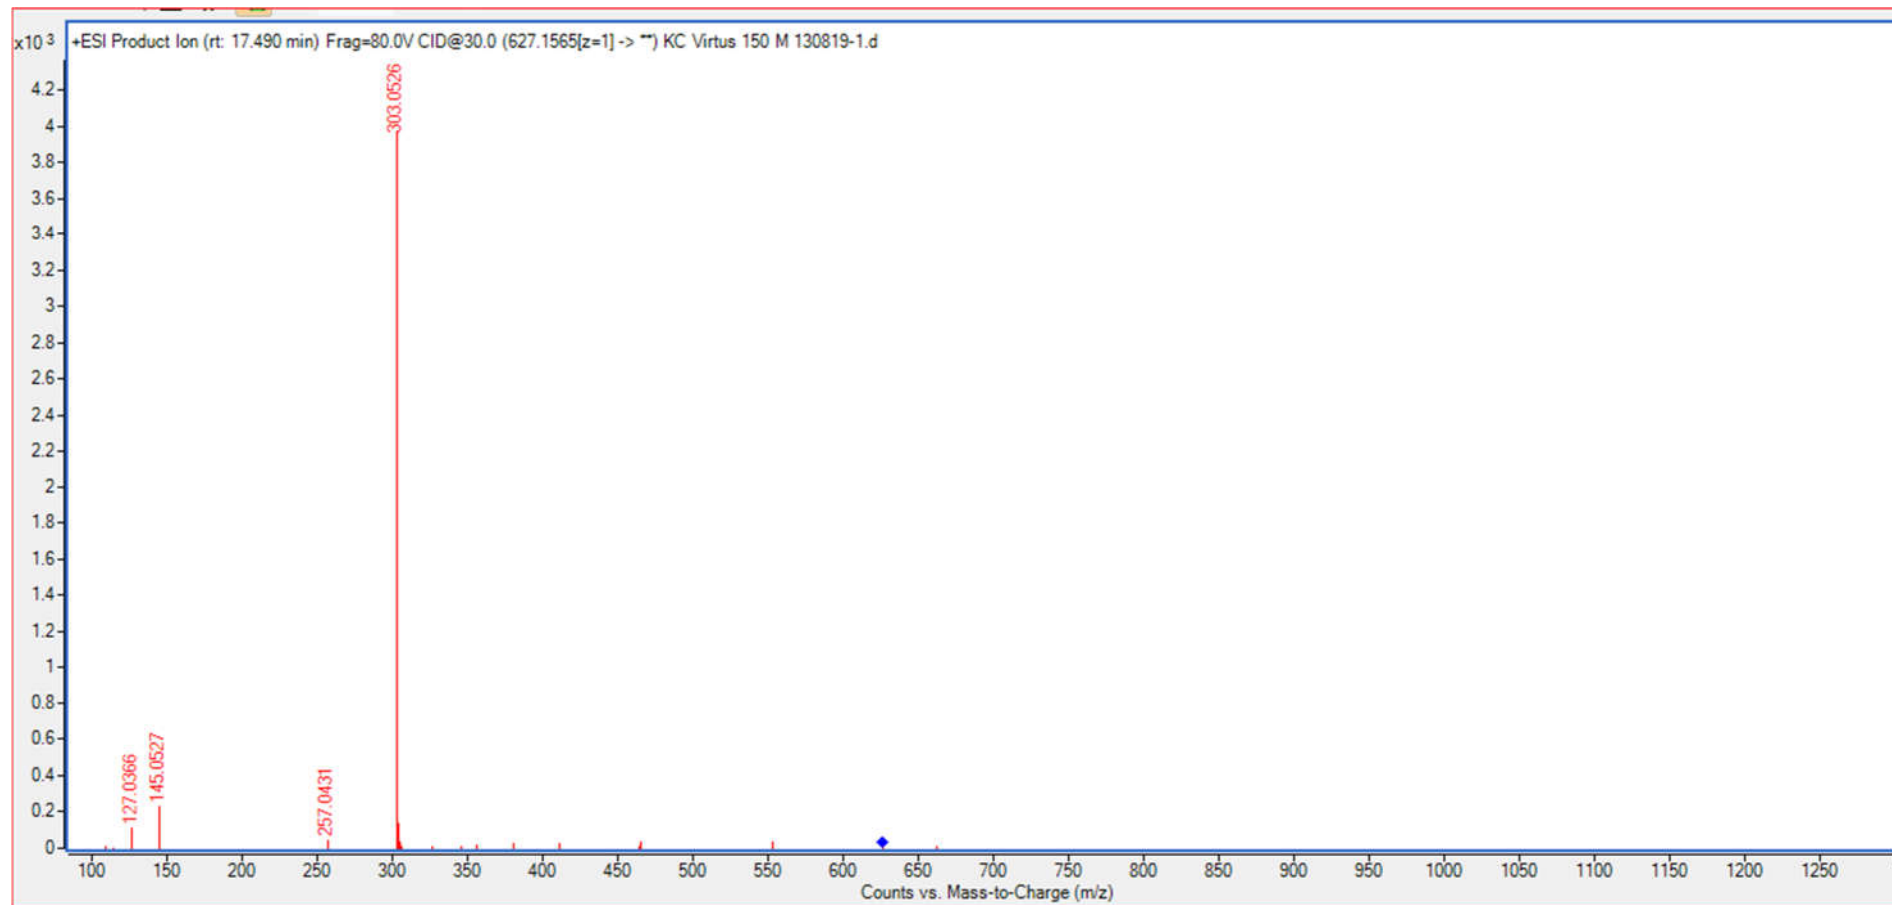

**Figure 1.** MS/MS spectra of Quercetin-O-sophoroside (1), CEV = 30 eV,  $[M+H]^+ = 627.1565$ .

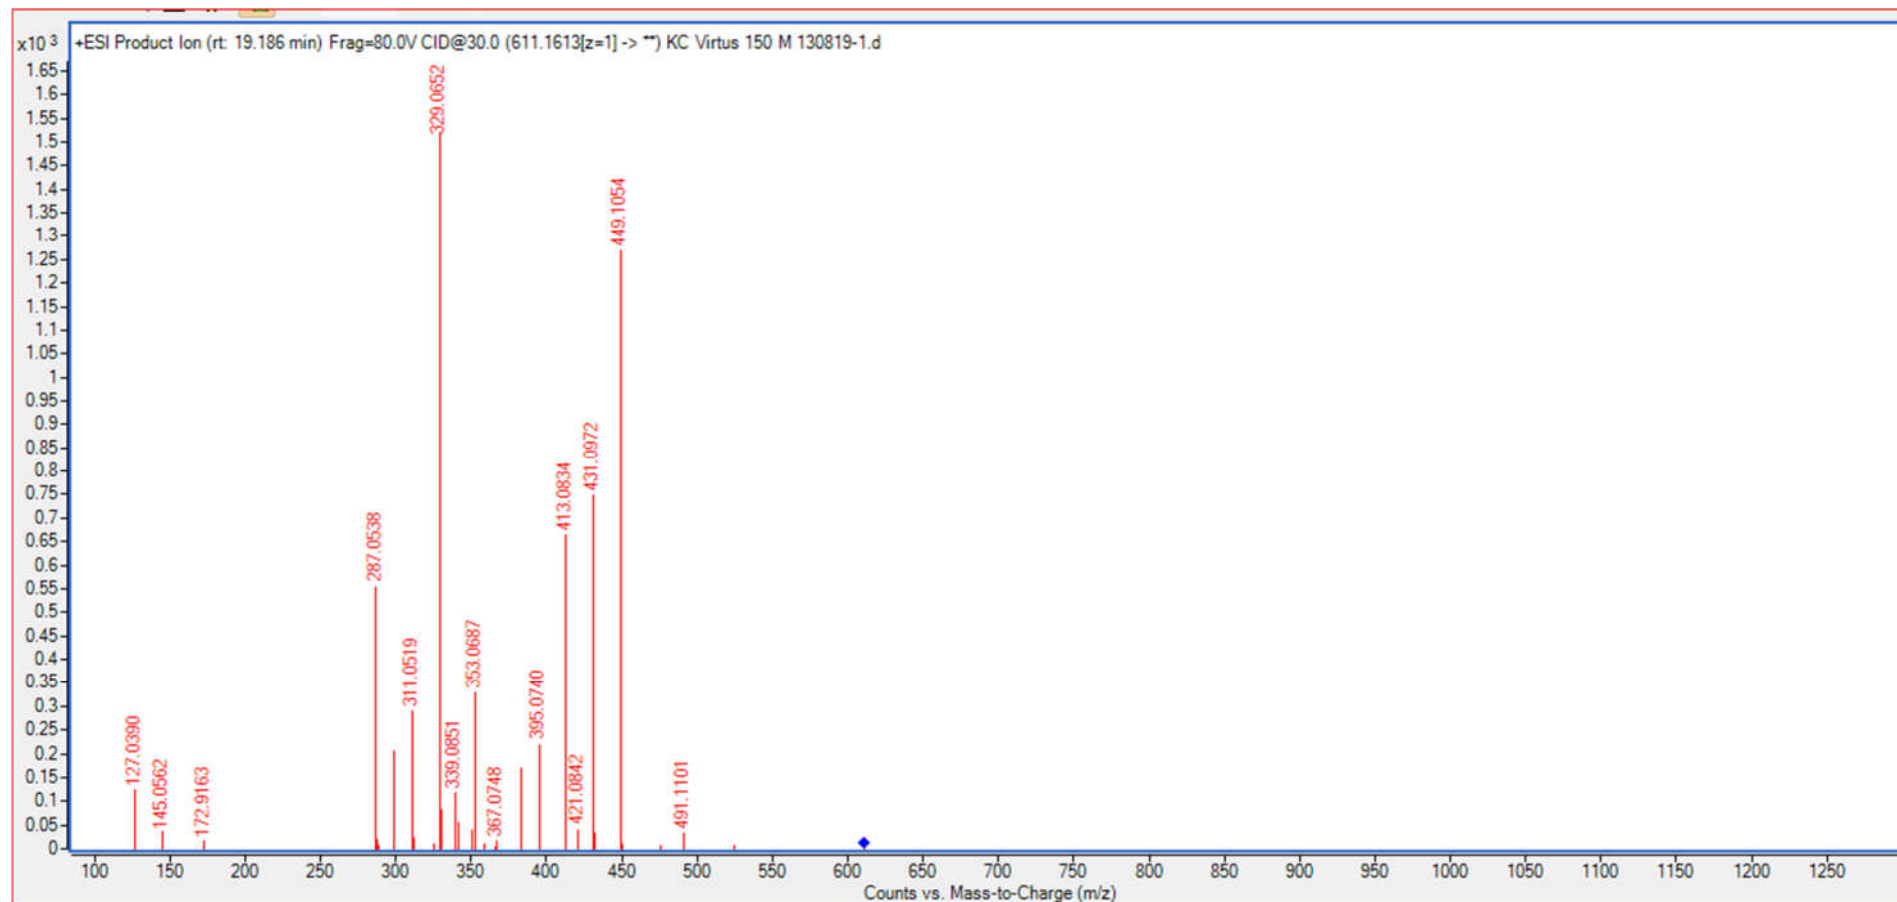

Figure 2. MS/MS spectra of Isoorientin-2''-O-glucoside (2), CEV = 30 eV,  $[M+H]^+$  = 611.1613.



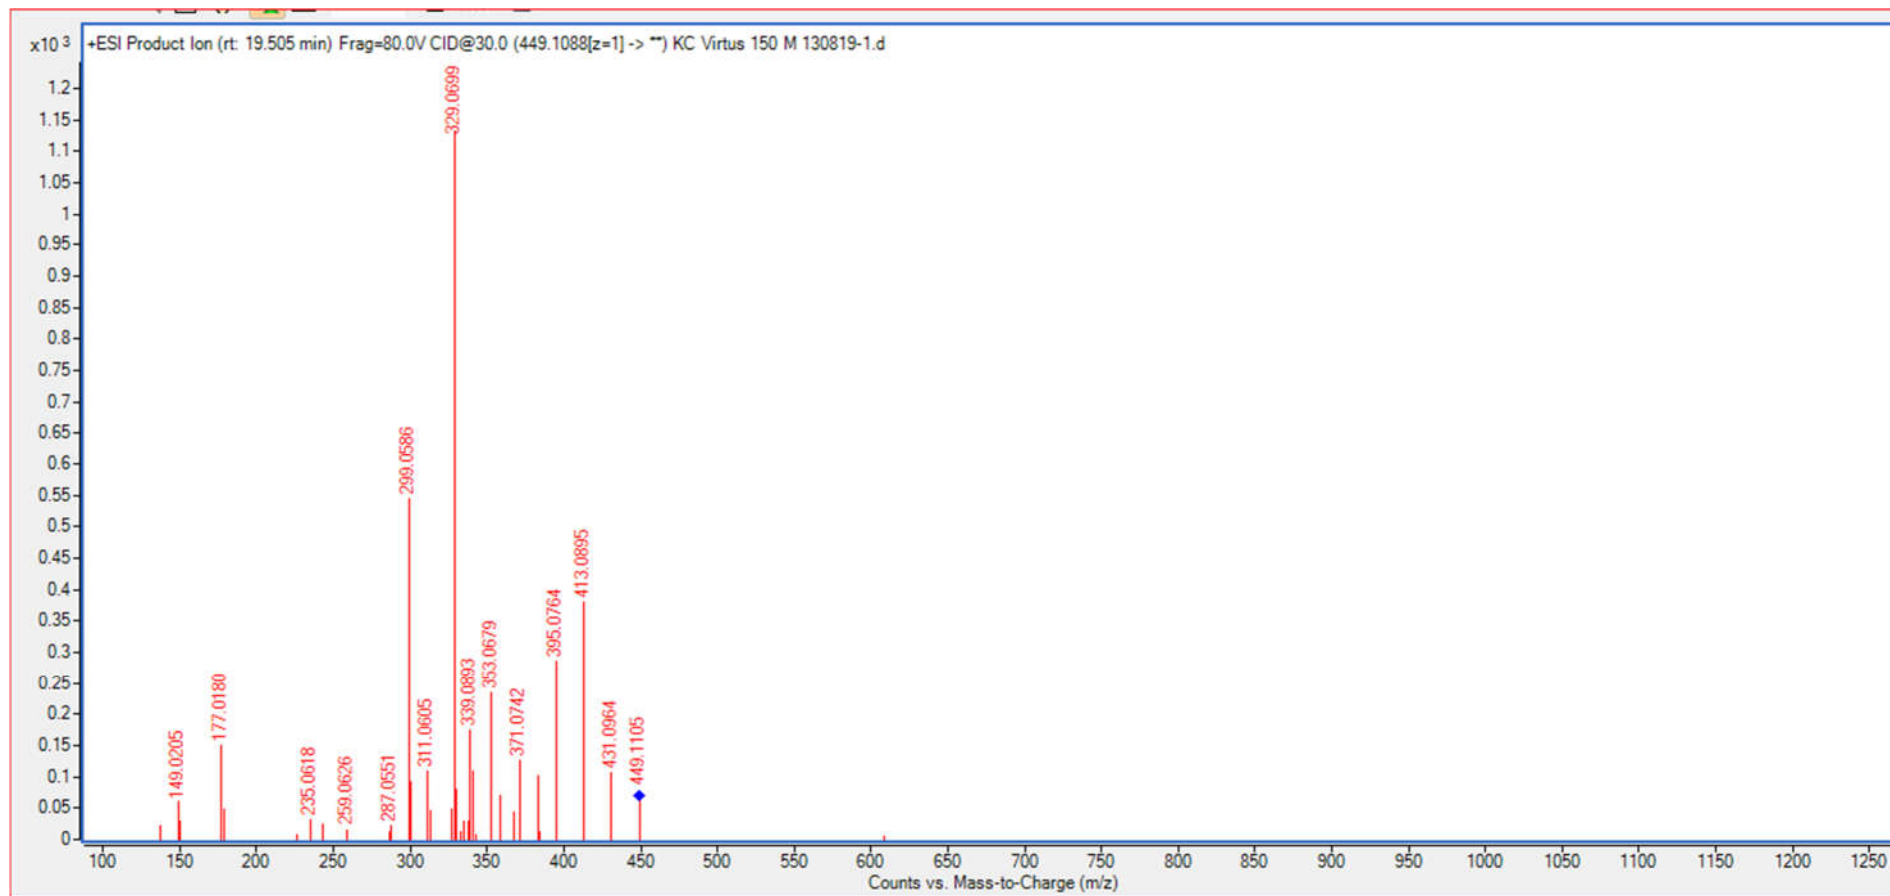

Figure 3. MS/MS spectra of Luteolin-C-glucoside (3), CEV = 30 eV,  $[M+H]^+ = 449.1088$ .

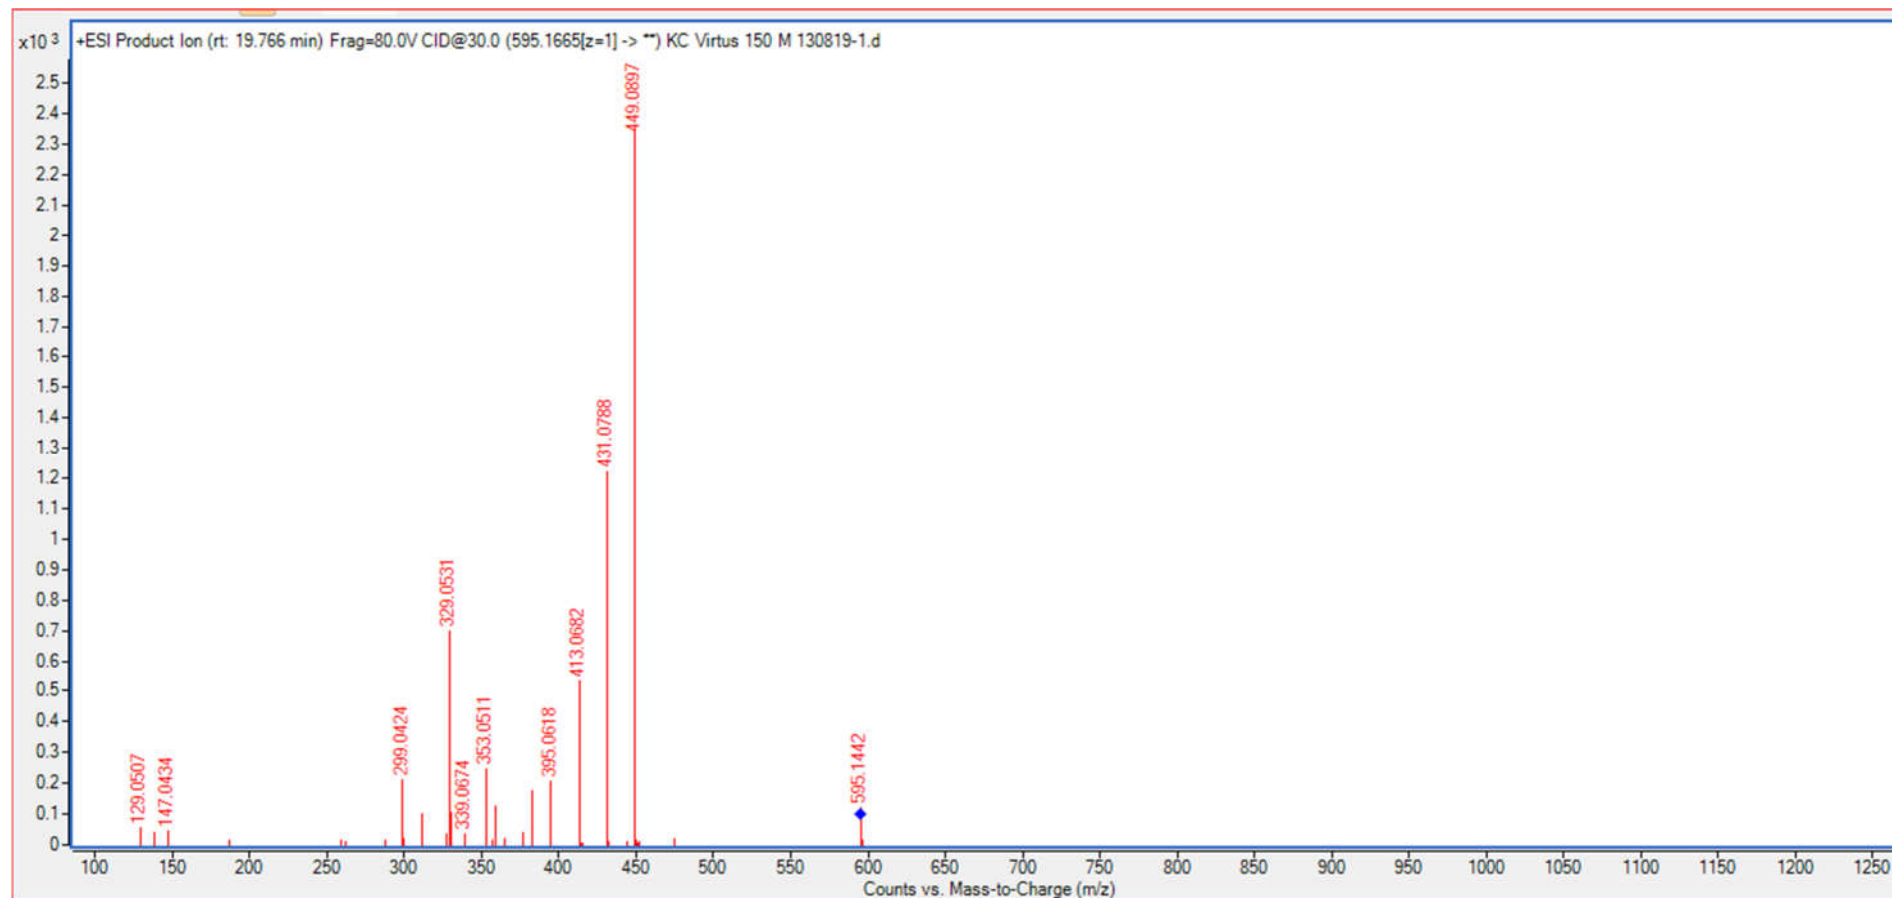

**Figure 4.** MS/MS spectra of Luteolin-C-hexoside-O-rhamnoside (4), CEV = 30 eV,  $[M+H]^+ = 595.1665$ .

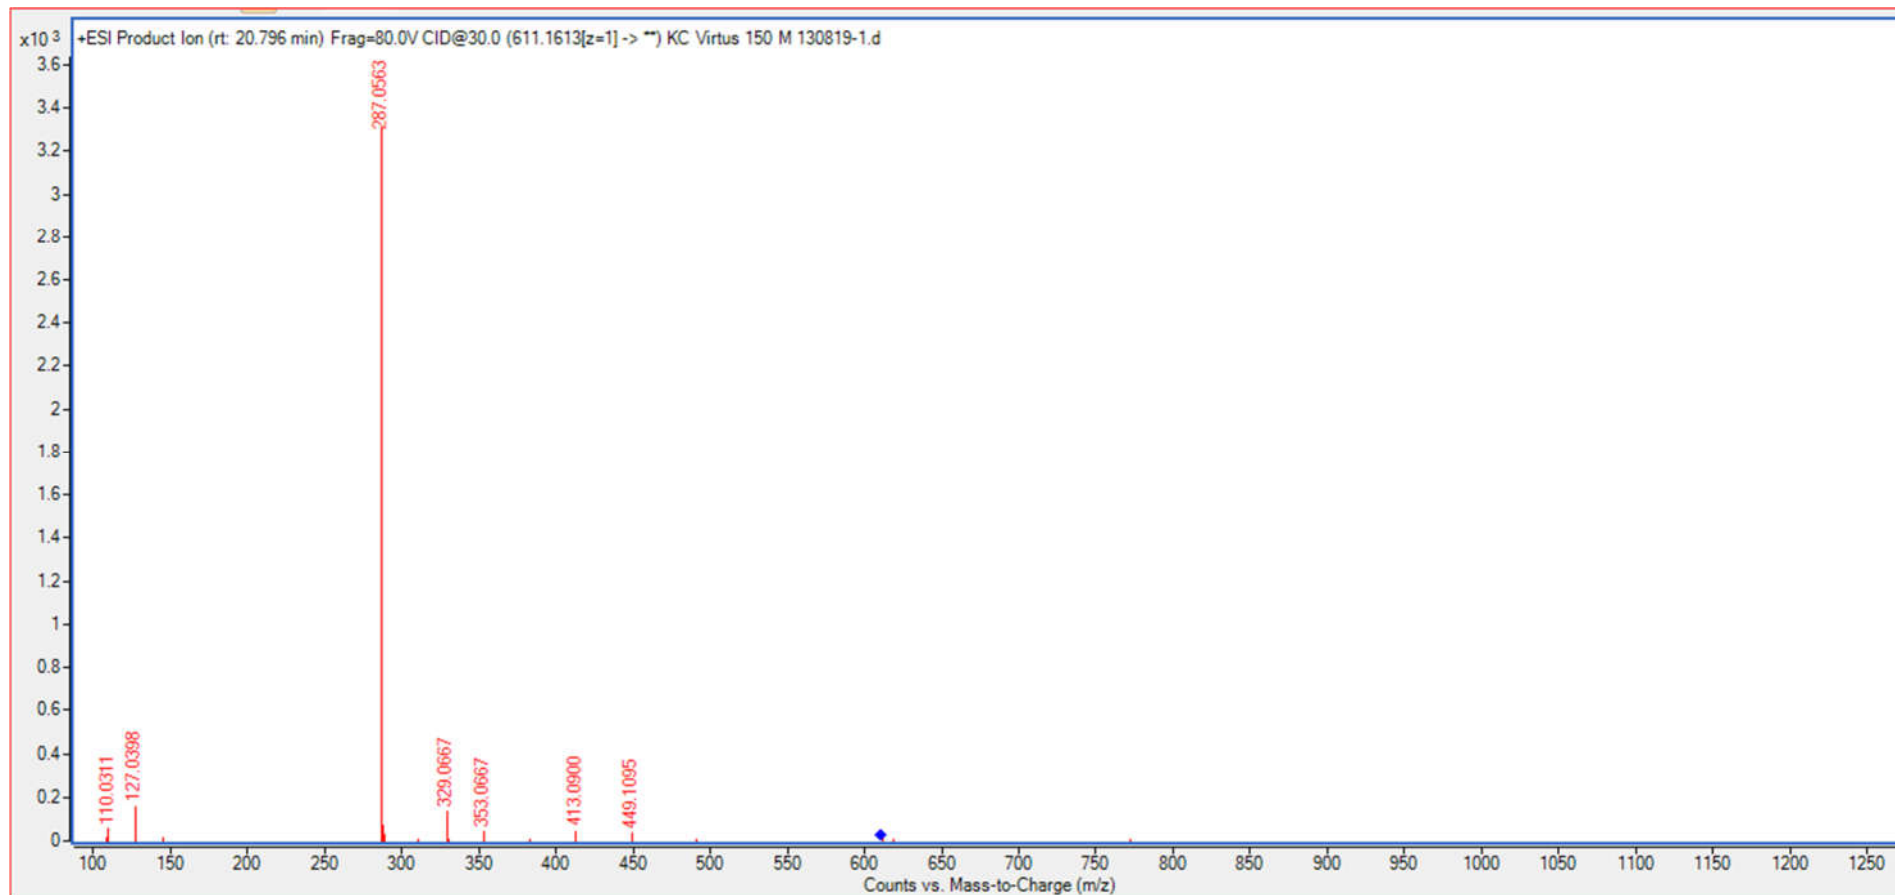

Figure 5. MS/MS spectra of Kaempferol-O-sophoroside (5), CEV = 30 eV,  $[M+H]^+$  = 611.1613.

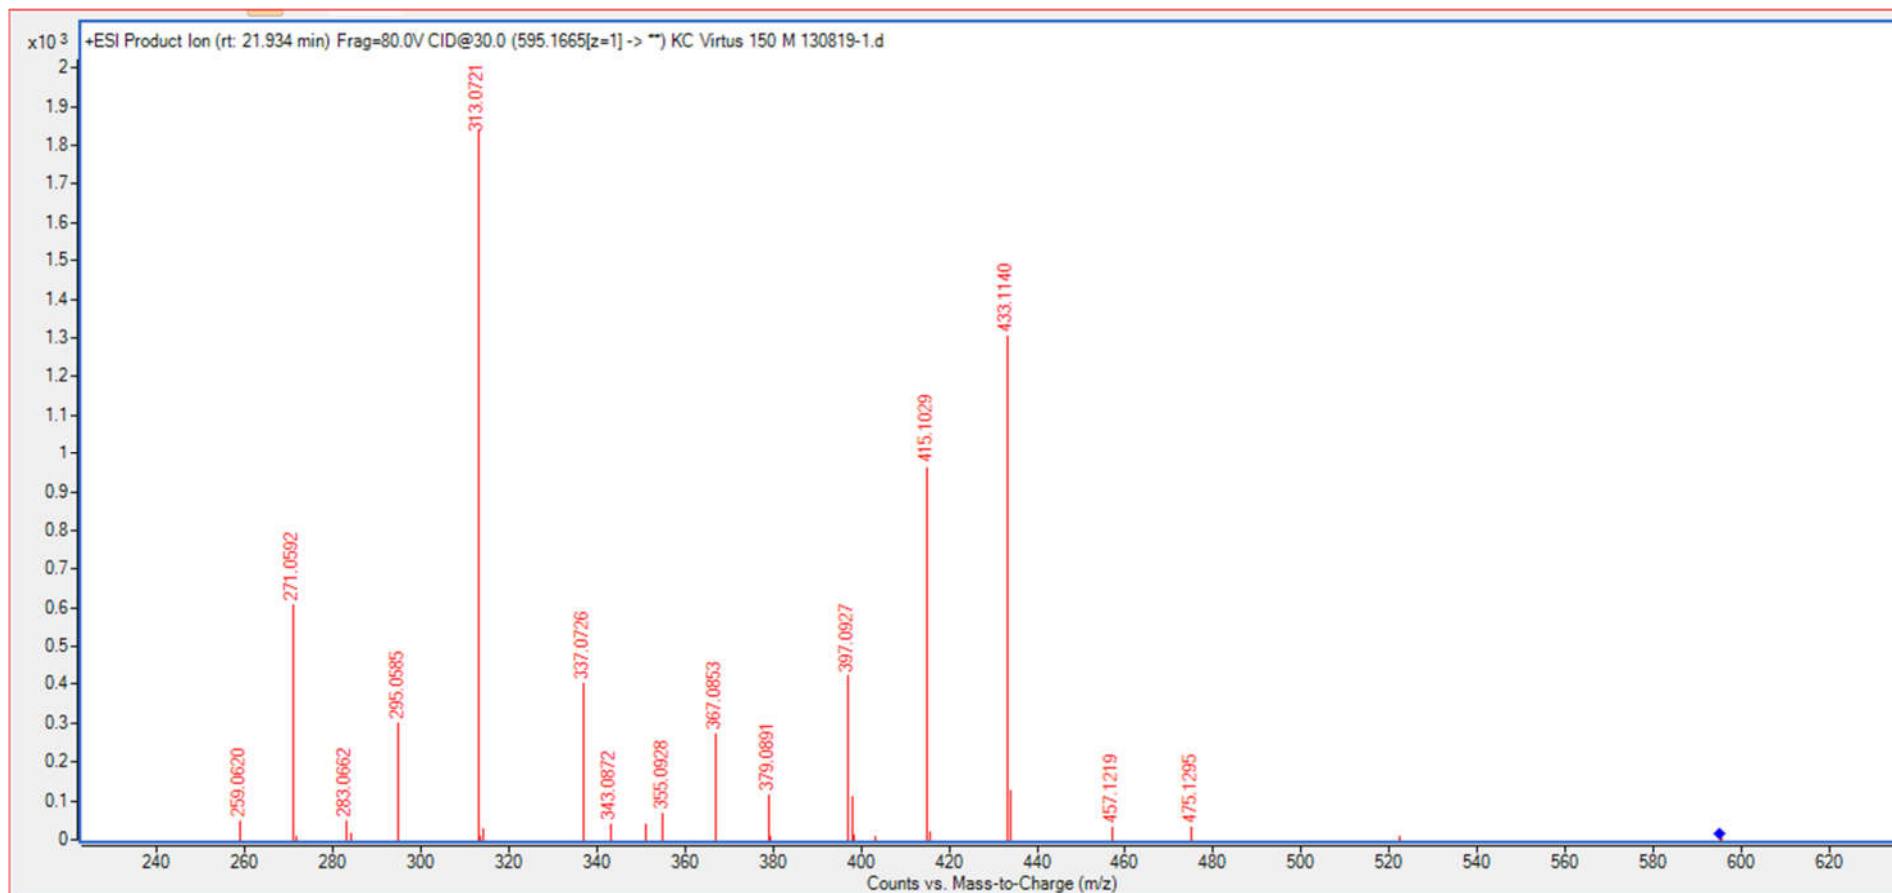

Figure 6. MS/MS spectra of Vitexin-2''-O-glucoside (6), CEV = 30 eV,  $[M+H]^+ = 595.1665$ .

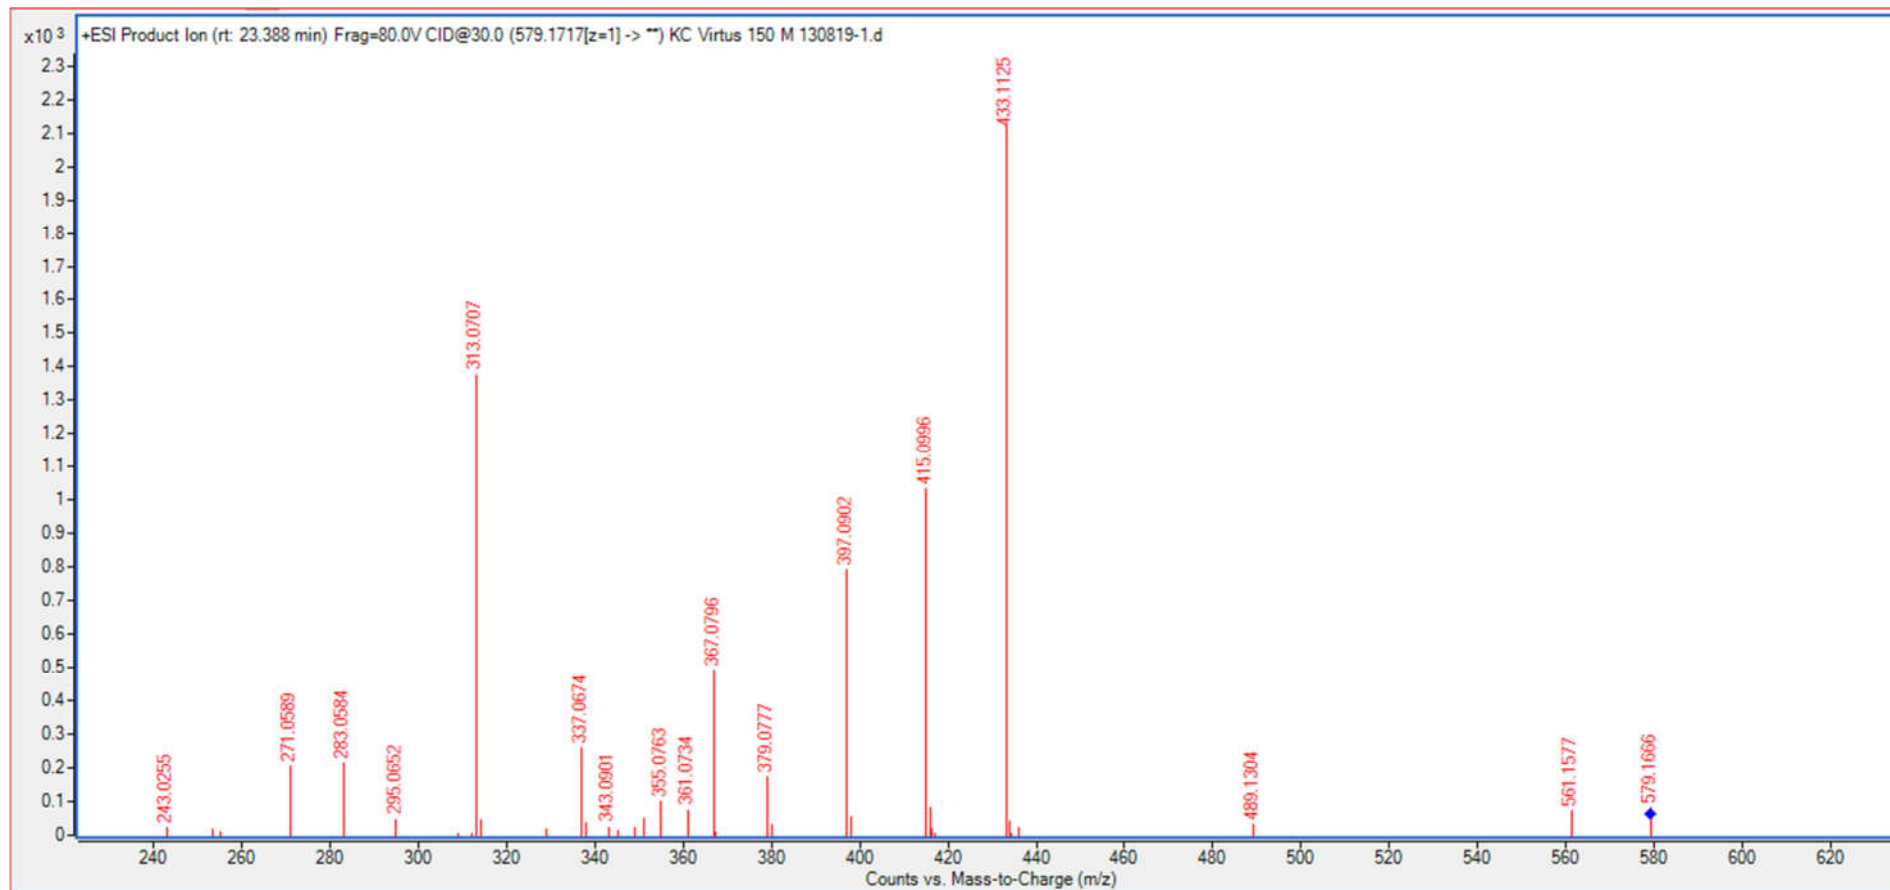

**Figure 7.** MS/MS spectra of Vitexin-2''-O-rhamnoside (7), CEV = 30 eV,  $[M+H]^+ = 579.1717$ .

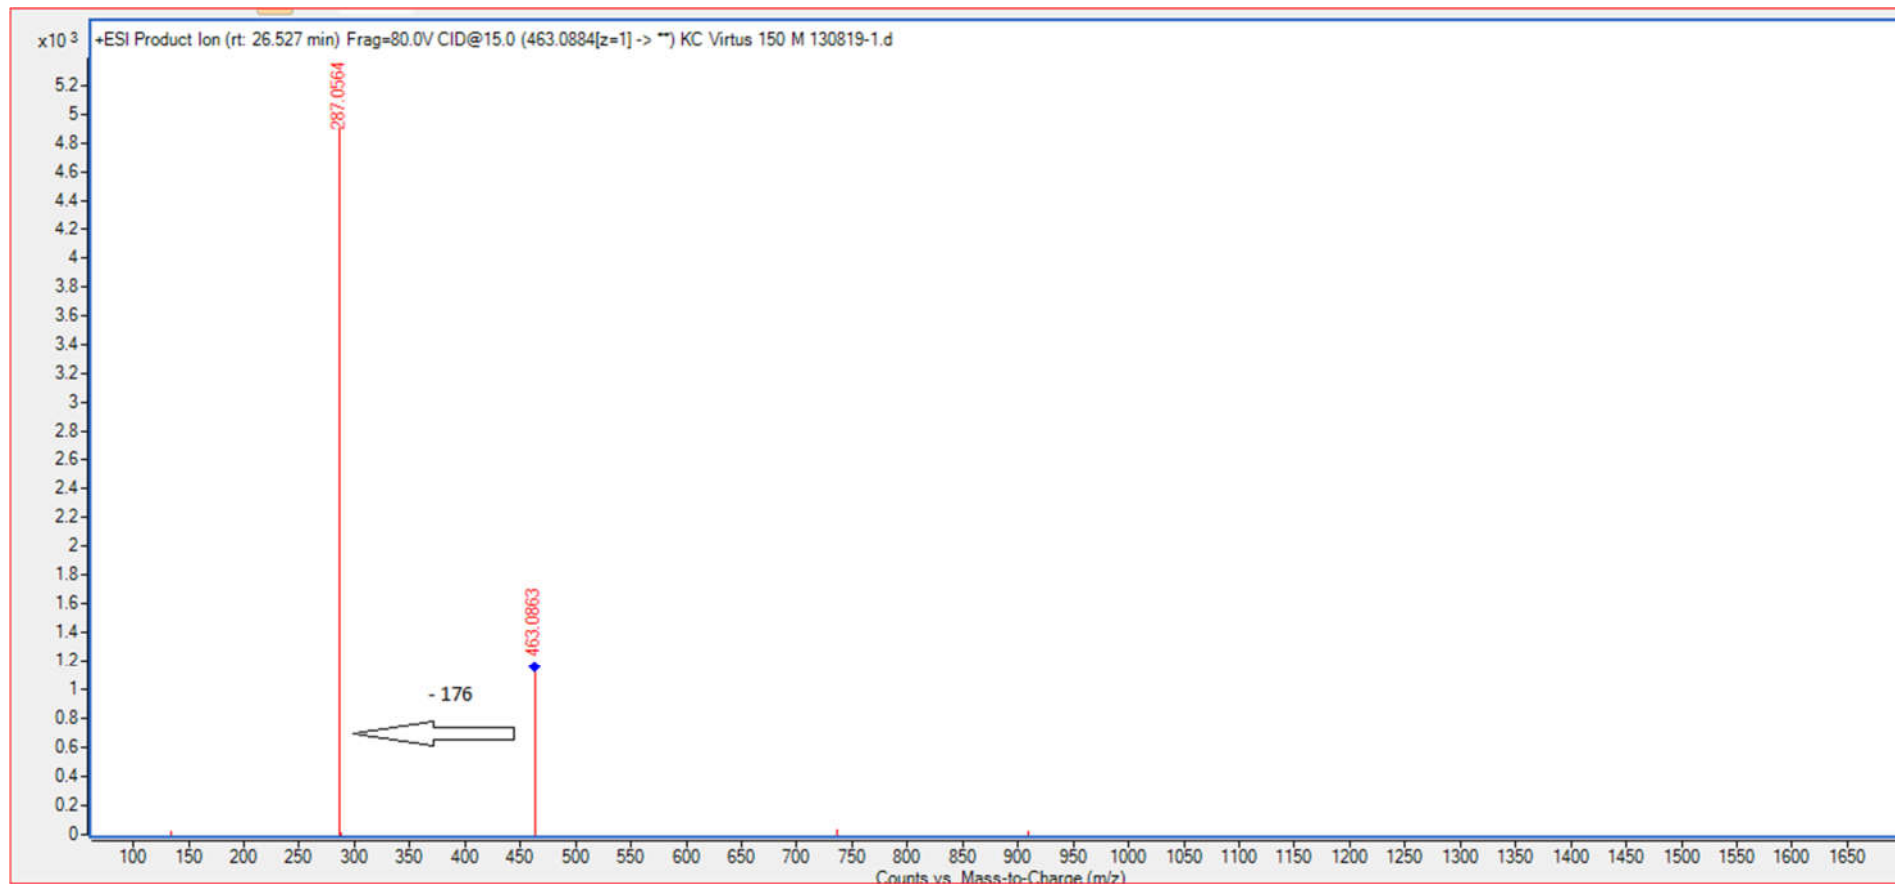

Figure 8. MS/MS spectra of Luteolin-7-O-glucuronide (8), CEV = 30 eV, [M+H]<sup>+</sup> = 463.0884.

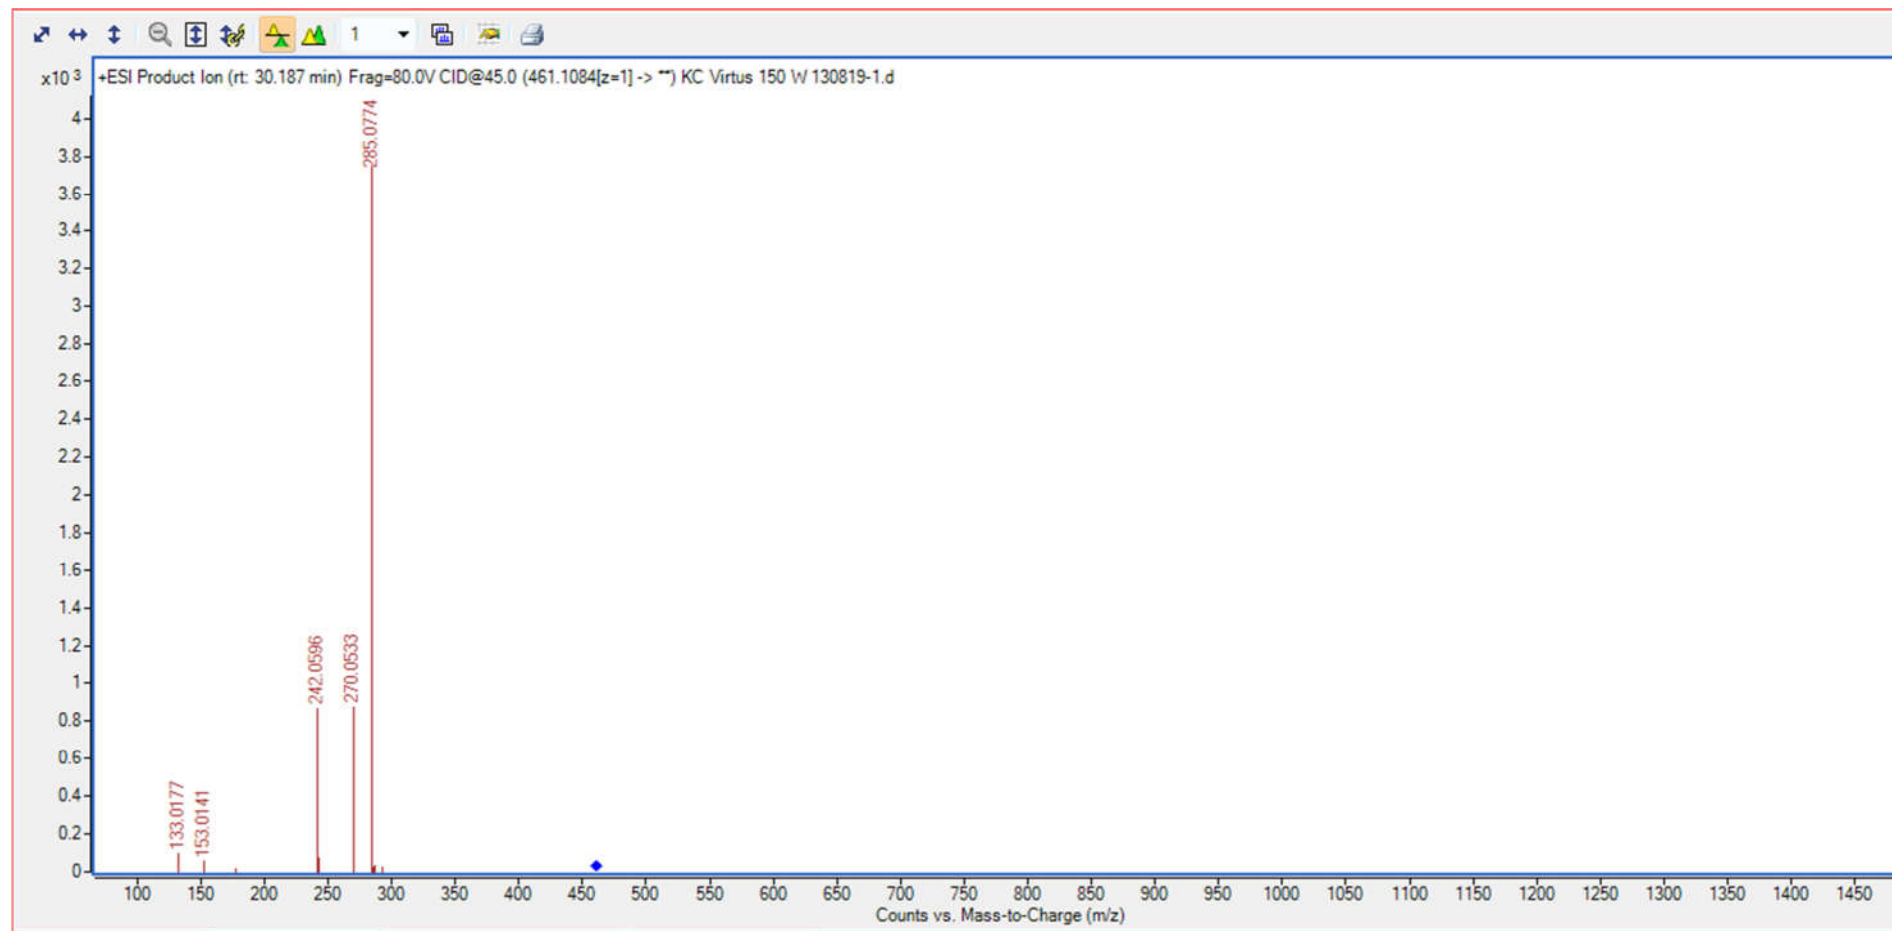

**Figure 9.** MS/MS spectra of Apigenin-4'-methoxy-7-glucuronide (12), CEV = 45 eV,  $[M+H]^+ = 461.1084$ .

**Table 3.** Maximum absorbance wavelength of reference compounds, and compounds identified in the different hemp cultivars.

| Compounds No, | Identification                   | $\lambda_{\max}$ (nm) |     |     |
|---------------|----------------------------------|-----------------------|-----|-----|
| Ref           | Kaempferol                       | 265                   | 365 |     |
| Ref           | Luteolin                         | 252                   | 267 | 349 |
| Ref           | Apigenin                         | 268                   | 338 |     |
| 2             | Isoorientin-2''-O-glucoside      | 254                   | 266 | 349 |
| 3             | Luteolin-C-glucoside             | 255                   | 267 | 350 |
| 4             | Luteolin-C-hexoside-O-rhamnoside | 256                   | 267 | 350 |
| 5             | Kaempferol-sophoroside           | 265                   | 346 |     |
| 6             | Vitexin-2''-O-glucoside          | 266                   | 338 |     |
| 7             | Vitexin-2-O-rhamnoside *         | 266                   | 338 |     |



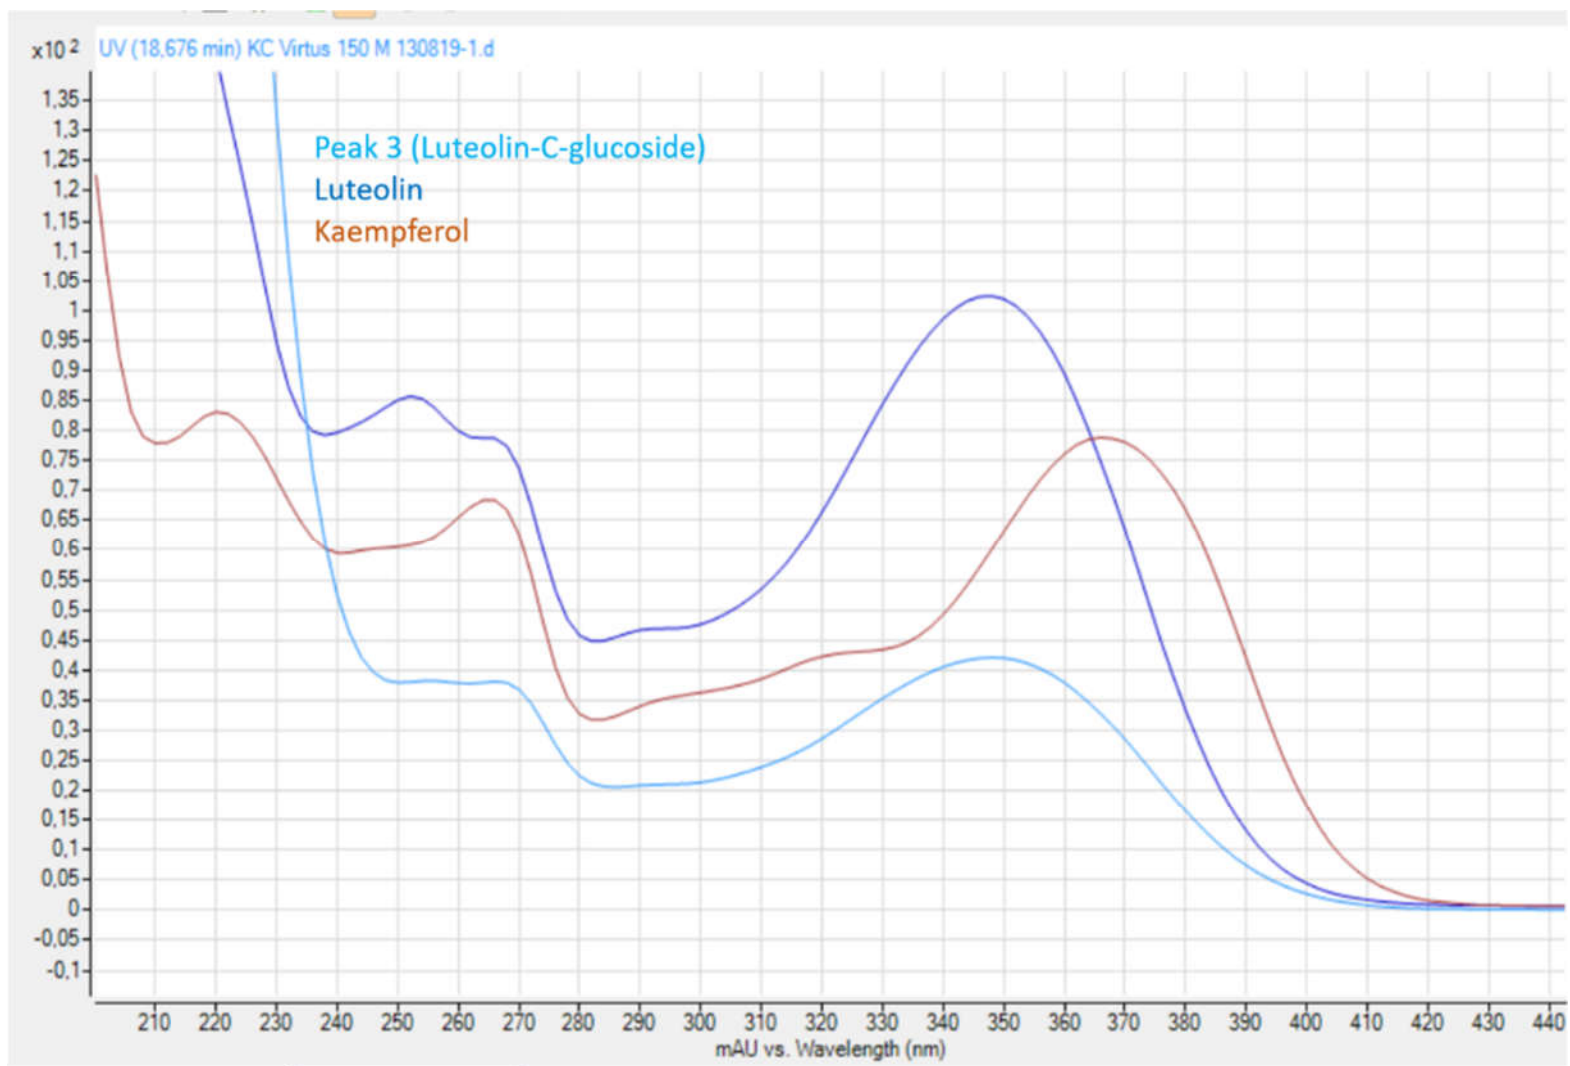

**Figure 10.** UV spectra of compound 3 (luteolin-C-glucoside), in comparison with UV spectra of Luteolin (blue) and Kaempferol (brown).

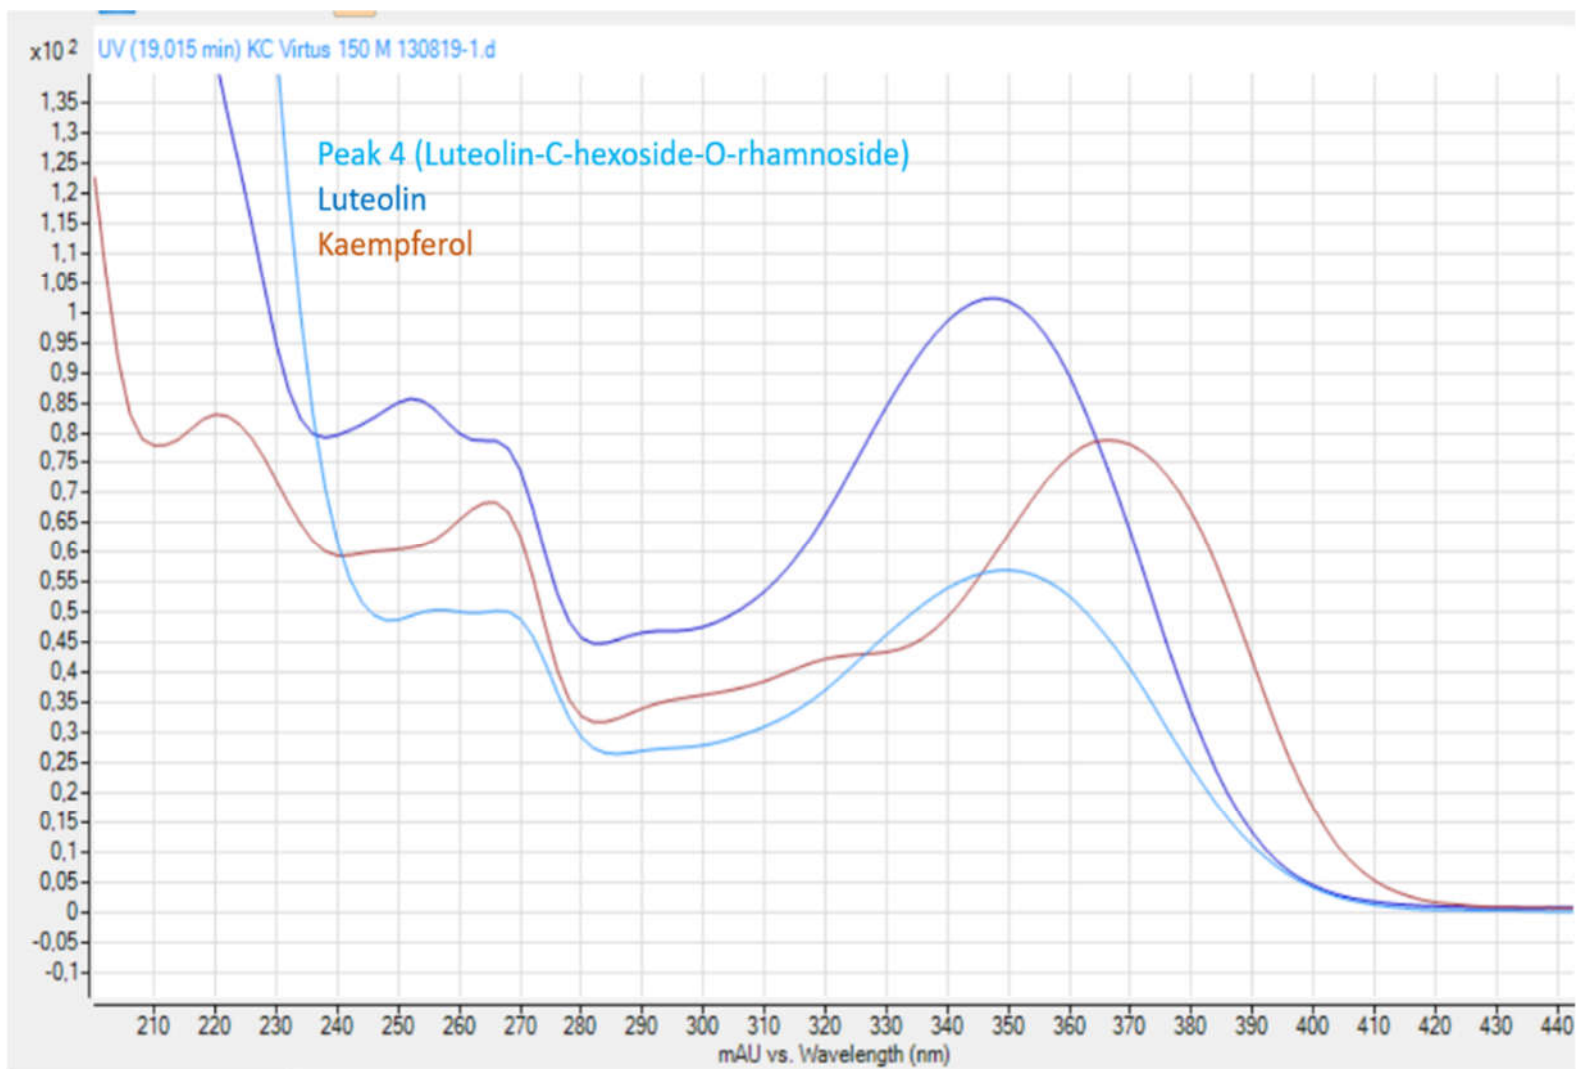

**Figure 11.** UV spectra of compound 4 (luteolin-C-hexoside-O-rhamnoside), in comparison with UV spectra of Luteolin (blue) and Kaempferol (brown).

**Table 4.** Flavonoid composition of Fedora 17 density 150. Data are presented as mean  $\pm$  SD in mg/g DW.

| No.                                   | Attempted identification           | 22.07.2019<br><i>Early flowering</i> | 13.08.2019<br><i>Full flowering</i> | 28.08.2019<br><i>End of flowering</i> | 10.09.2019<br><i>End of flowering</i> |
|---------------------------------------|------------------------------------|--------------------------------------|-------------------------------------|---------------------------------------|---------------------------------------|
| 1                                     | Quercetin-O-sophoroside            | <i>nd</i>                            | <i>nd</i>                           | <i>nd</i>                             | <i>nd</i>                             |
| 2                                     | Isoorientin-2''-O-glucoside        | 0.386 $\pm$ 0.011                    | 0.125 $\pm$ 0.002                   | 0.139 $\pm$ 0.006                     | 0.071 $\pm$ 0.002                     |
| 3                                     | Luteolin-C-glucoside               | 0.124 $\pm$ 0.001                    | 0.041 $\pm$ 0.001                   | 0.026 $\pm$ 0.000                     | 0.014 $\pm$ 0.002                     |
| 4                                     | Luteolin-C-hexoside-O-rhamnoside   | 0.249 $\pm$ 0.001                    | 0.111 $\pm$ 0.001                   | 0.110 $\pm$ 0.004                     | 0.056 $\pm$ 0.003                     |
| 5                                     | Kaempferol-O-sophoroside           | <i>nd</i>                            | <i>nd</i>                           | <i>nd</i>                             | <i>nd</i>                             |
| 6                                     | Vitexin-2''-O-glucoside            | 0.329 $\pm$ 0.004                    | 0.062 $\pm$ 0.005                   | 0.048 $\pm$ 0.006                     | 0.018 $\pm$ 0.003                     |
| 7                                     | Vitexin-2-O-rhamnoside *           | 0.279 $\pm$ 0.014                    | 0.082 $\pm$ 0.006                   | 0.056 $\pm$ 0.007                     | 0.014 $\pm$ 0.007                     |
| 8                                     | Luteolin-7-O-glucuronide *         | 1.836 $\pm$ 0.080                    | 0.830 $\pm$ 0.005                   | 0.713 $\pm$ 0.022                     | 0.396 $\pm$ 0.007                     |
| 9                                     | Apigenin-7-O-glucuronide *         | 0.242 $\pm$ 0.007                    | 0.123 $\pm$ 0.007                   | 0.074 $\pm$ 0.009                     | 0.049 $\pm$ 0.006                     |
| 10                                    | Chrysoeriol-O-glucuronide isomer 1 | 0.068 $\pm$ 0.001                    | 0.039 $\pm$ 0.002                   | 0.030 $\pm$ 0.002                     | 0.026 $\pm$ 0.004                     |
| 11                                    | Chrysoeriol-O-glucuronide isomer 2 | <i>nd</i>                            | <i>nd</i>                           | <i>nd</i>                             | <i>nd</i>                             |
| 12                                    | Apigenin-4'-methoxy-7-glucuronide  | <i>nd</i>                            | 0.010 $\pm$ 0.000                   | 0.001 $\pm$ 0.001                     | <i>nd</i>                             |
| 13                                    | Luteolin *                         | <i>nd</i>                            | <i>Nd</i>                           | <i>nd</i>                             | <i>nd</i>                             |
| 14                                    | Apigenin *                         | <i>nd</i>                            | <i>nd</i>                           | <i>nd</i>                             | <i>nd</i>                             |
| 15                                    | Chrysoeriol *                      | <i>nd</i>                            | <i>nd</i>                           | <i>nd</i>                             | <i>nd</i>                             |
| Total amount of identified flavonoids |                                    | 3.513 $\pm$ 0.119                    | 1.425 $\pm$ 0.029                   | 1.198 $\pm$ 0.056                     | 0.644 $\pm$ 0.020                     |

*nd* not detected.

**Table 5.** Flavonoid composition of Felina 32 density 300 and 150 seeds/m<sup>2</sup>. Data are presented as mean  $\pm$  SD in mg/g DW.

| No                                    | Attempted identification           | Density 150            |                       |                         |                         | Density 300            |                         |
|---------------------------------------|------------------------------------|------------------------|-----------------------|-------------------------|-------------------------|------------------------|-------------------------|
|                                       |                                    | 22.07.2019             | 13.08.2019            | 27.08.2019              | 10.09.2019              | 22.07.2019             | 10.09.2019              |
|                                       |                                    | <i>Early flowering</i> | <i>Full flowering</i> | <i>End of flowering</i> | <i>End of flowering</i> | <i>Early flowering</i> | <i>End of flowering</i> |
| 1                                     | Quercetin-O-sophoroside            | nd                     | nd                    | nd                      | nd                      | nd                     | nd                      |
| 2                                     | Isoorientin-2''-O-glucoside        | 0.166 $\pm$ 0.009      | 0.095 $\pm$ 0.004     | 0.112 $\pm$ 0.002       | 0.018 $\pm$ 0.004       | 0.514 $\pm$ 0.005      | 0.105 $\pm$ 0.003       |
| 3                                     | Luteolin-C-glucoside               | 0.073 $\pm$ 0.004      | 0.021 $\pm$ 0.001     | 0.023 $\pm$ 0.002       | 0.001 $\pm$ 0.002       | 0.208 $\pm$ 0.002      | 0.023 $\pm$ 0.001       |
| 4                                     | Luteolin-C-hexoside-O-rhamnoside   | 0.186 $\pm$ 0.008      | 0.111 $\pm$ 0.003     | 0.123 $\pm$ 0.008       | 0.030 $\pm$ 0.006       | 0.328 $\pm$ 0.003      | 0.098 $\pm$ 0.003       |
| 5                                     | Kaempferol-O-sophoroside           | nd                     | nd                    | nd                      | nd                      | nd                     | nd                      |
| 6                                     | Vitexin-2''-O-glucoside            | 0.249 $\pm$ 0.015      | 0.134 $\pm$ 0.006     | 0.080 $\pm$ 0.002       | 0 $\pm$ 0.006           | 0.745 $\pm$ 0.009      | 0.060 $\pm$ 0.004       |
| 7                                     | Vitexin-2-O-rhamnoside *           | 0.408 $\pm$ 0.011      | 0.217 $\pm$ 0.006     | 0.120 $\pm$ 0.008       | 0.009 $\pm$ 0.009       | 0.629 $\pm$ 0.009      | 0.079 $\pm$ 0.008       |
| 8                                     | Luteolin-7-O-glucuronide *         | 1.983 $\pm$ 0.177      | 1.177 $\pm$ 0.050     | 1.312 $\pm$ 0.003       | 0.535 $\pm$ 0.086       | 3.381 $\pm$ 0.032      | 0.977 $\pm$ 0.034       |
| 9                                     | Apigenin-7-O-glucuronide *         | 0.641 $\pm$ 0.029      | 0.391 $\pm$ 0.011     | 0.284 $\pm$ 0.017       | 0.181 $\pm$ 0.029       | 0.734 $\pm$ 0.010      | 0.181 $\pm$ 0.003       |
| 10                                    | Chrysoeriol-O-glucuronide isomer 1 | 0.073 $\pm$ 0.001      | 0.054 $\pm$ 0.001     | 0.049 $\pm$ 0.003       | 0.038 $\pm$ 0.009       | 0.101 $\pm$ 0.001      | 0.036 $\pm$ 0.002       |
| 11                                    | Chrysoeriol-O-glucuronide isomer 2 | nd                     | nd                    | nd                      | nd                      | nd                     | nd                      |
| 12                                    | Apigenin-4'-methoxy-7-glucuronide  | 0.641 $\pm$ 0.001      | 0.391 $\pm$ 0.000     | 0.284 $\pm$ 0.001       | 0.181 $\pm$ 0.029       | 0.734 $\pm$ 0.001      | 0.181 $\pm$ 0.001       |
| 13                                    | Luteolin *                         | nd                     | nd                    | nd                      | nd                      | nd                     | nd                      |
| 14                                    | Apigenin *                         | nd                     | nd                    | nd                      | nd                      | nd                     | nd                      |
| 15                                    | Chrysoeriol *                      | nd                     | nd                    | nd                      | nd                      | nd                     | nd                      |
| Total amount of identified flavonoids |                                    | 4.420 $\pm$ 0.251      | 2.591 $\pm$ 0.084     | 2.388 $\pm$ 0.006       | 0.950 $\pm$ 0.145       | 7.373 $\pm$ 0.075      | 1.741 $\pm$ 0.059       |

nd: not detected.

**Table 6.** Flavonoid composition of KC Virtus density 30 seeds/m<sup>2</sup> male and female inflorescences. Data are presented as mean ± SD in mg/g DW.

| No.                                   | Attempted identification                           | Density 30 Male flowers | Density 30 Female flowers            |                                   |
|---------------------------------------|----------------------------------------------------|-------------------------|--------------------------------------|-----------------------------------|
|                                       |                                                    | 27.08.2019              | 27.08.2019<br><i>Early flowering</i> | 10.09.19<br><i>Full flowering</i> |
| 1                                     | Quercetin- <i>O</i> -sophoroside                   | 0.175 ± 0.009           | ND                                   | ND                                |
| 2                                     | Isoorientin-2''- <i>O</i> -glucoside               | 0.157 ± 0.001           | 0.453 ± 0.038                        | 0.153 ± 0.003                     |
| 3                                     | Luteolin- <i>C</i> -glucoside                      | 0.044 ± 0.000           | 0.175 ± 0.012                        | 0.043 ± 0.002                     |
| 4                                     | Luteolin- <i>C</i> -hexoside- <i>O</i> -rhamnoside | 0.094 ± 0.000           | 0.259 ± 0.021                        | 0.144 ± 0.000                     |
| 5                                     | Kaempferol- <i>O</i> -sophoroside                  | 0.070 ± 0.003           | ND                                   | ND                                |
| 6                                     | Vitexin-2''- <i>O</i> -glucoside                   | 0.265 ± 0.011           | 0.719 ± 0.063                        | 0.165 ± 0.006                     |
| 7                                     | Vitexin-2- <i>O</i> -rhamnoside *                  | 0.189 ± 0.001           | 0.468 ± 0.032                        | 0.166 ± 0.006                     |
| 8                                     | Luteolin-7- <i>O</i> -glucuronide *                | 1.261 ± 0.014           | 2.510 ± 0.201                        | 1.675 ± 0.031                     |
| 9                                     | Apigenin-7- <i>O</i> -glucuronide *                | 0.315 ± 0.001           | 0.483 ± 0.034                        | 0.392 ± 0.002                     |
| 10                                    | Chrysoeriol- <i>O</i> -glucuronide isomer 1        | 0.089 ± 0.001           | 0.098 ± 0.007                        | 0.101 ± 0.003                     |
| 11                                    | Chrysoeriol- <i>O</i> -glucuronide isomer 2        | 0.092 ± 0.003           | 0.071 ± 0.005                        | ND                                |
| 12                                    | Apigenin-4'-methoxy-7-glucuronide                  | ND                      | ND                                   | ND                                |
| 13                                    | Luteolin *                                         | ND                      | ND                                   | ND                                |
| 14                                    | Apigenin *                                         | ND                      | ND                                   | ND                                |
| 15                                    | Chrysoeriol *                                      | ND                      | ND                                   | ND                                |
| Total amount of identified flavonoids |                                                    | 2.751                   | 5.235                                | 2.838                             |

nd: not detected.

**Table 7.** Flavonoid composition of KC Virtus density 150 seeds/m<sup>2</sup> male and female inflorescences. Data are presented as mean ± SD in mg/g DW.

| No.                                   | Attempted identification                           | Density 150 Male flowers |               | Density 150 Female flowers           |                                      |                                      |                                     |
|---------------------------------------|----------------------------------------------------|--------------------------|---------------|--------------------------------------|--------------------------------------|--------------------------------------|-------------------------------------|
|                                       |                                                    | 13.08.2019               | 27.08.2019    | 22.07.2019<br><i>Early flowering</i> | 13.08.2019<br><i>Early flowering</i> | 27.08.2019<br><i>Early flowering</i> | 10.09.2019<br><i>Full flowering</i> |
| 1                                     | Quercetin- <i>O</i> -sophorosid                    | 0.043 ± 0.005            | 0.213 ± 0.002 | ND                                   | ND                                   | ND                                   | ND                                  |
| 2                                     | Isoorientin-2''- <i>O</i> -glucoside               | 0.051 ± 0.003            | 0.236 ± 0.008 | 0.302 ± 0.023                        | 0.219 ± 0.015                        | 0.232 ± 0.002                        | 0.034 ± 0.048                       |
| 3                                     | Luteolin- <i>C</i> -glucoside                      | 0.020 ± 0.000            | 0.055 ± 0.002 | 0.155 ± 0.010                        | 0.065 ± 0.004                        | 0.062 ± 0.001                        | 0.004 ± 0.006                       |
| 4                                     | Luteolin- <i>C</i> -hexoside- <i>O</i> -rhamnoside | 0.052 ± 0.003            | 0.179 ± 0.006 | 0.160 ± 0.012                        | 0.174 ± 0.011                        | 0.144 ± 0.003                        | 0.031 ± 0.044                       |
| 5                                     | Kaempferol- <i>O</i> -sophorosid                   | 0.029 ± 0.000            | 0.059 ± 0.001 | ND                                   | ND                                   | ND                                   | ND                                  |
| 6                                     | Vitexin-2''- <i>O</i> -glucoside                   | 0.061 ± 0.007            | 0.440 ± 0.021 | 0.841 ± 0.010                        | 0.487 ± 0.033                        | 0.400 ± 0.009                        | 0.0430.061                          |
| 7                                     | Vitexin-2- <i>O</i> -rhamnoside *                  | 0.153 ± 0.010            | 0.405 ± 0.018 | 0.558 ± 0.156                        | 0.433 ± 0.023                        | 0.246 ± 0.005                        | < 0.075                             |
| 8                                     | Luteolin-7- <i>O</i> -glucuronid *                 | 0.548 ± 0.018            | 1.544 ± 0.052 | 2.424 ± 0.161                        | 2.053 ± 0.161                        | 1.165 ± 0.007                        | 0.259 ± 0.325                       |
| 9                                     | Apigenin-7- <i>O</i> -glucuronid *                 | 0.144 ± 0.002            | 0.393 ± 0.017 | 0.882 ± 0.031                        | 0.696 ± 0.039                        | 0.281 ± 0.000                        | 0.102 ± 0.075                       |
| 10                                    | Chrysoeriol- <i>O</i> -glucuronid isomer 1         | 0.032 ± 0.001            | 0.070 ± 0.003 | 0.105 ± 0.002                        | 0.082 ± 0.004                        | 0.054 ± 0.001                        | 0.022 ± 0.003                       |
| 11                                    | Chrysoeriol- <i>O</i> -glucuronid isomer 2         | 0.046 ± 0.003            | 0.093 ± 0.008 | 0.118 ± 0.003                        | 0.119 ± 0.008                        | 0.047 ± 0.000                        | 0.026 ± 0.013                       |
| 12                                    | Apigenin-4'-methoxy-7-glucuronid                   | ND                       | ND            | 0.033 ± 0.002                        | 0.057 ± 0.003                        | ND                                   | ND                                  |
| 13                                    | Luteolin *                                         | 0.118 ± 0.005            | ND            | ND                                   | ND                                   | ND                                   | ND                                  |
| 14                                    | Apigenin *                                         | 0.07 ± 70.002            | ND            | ND                                   | ND                                   | ND                                   | ND                                  |
| 15                                    | Chrysoeriol *                                      | 0.018 ± 0.000            | ND            | ND                                   | ND                                   | ND                                   | ND                                  |
| Total amount of identified flavonoids |                                                    | 1.399                    | 3.694         | 5.584                                | 4.390                                | 2.635                                | 0.514                               |

nd: not detected.

**Table 8.** Flavonoid composition of KC Virtus density 300 seeds/m<sup>2</sup> male and female inflorescences. Data are presented as mean ± SD in mg/g DW.

| No.                                   | Attempted identification                           | Density 300 Male flowers |               | Density 300 Female flowers           |                                      |                                      |                                     |
|---------------------------------------|----------------------------------------------------|--------------------------|---------------|--------------------------------------|--------------------------------------|--------------------------------------|-------------------------------------|
|                                       |                                                    | 13.08.2019               | 27.08.2019    | 22.07.2019<br><i>Early flowering</i> | 13.08.2019<br><i>Early flowering</i> | 27.08.2019<br><i>Early flowering</i> | 10.09.2019<br><i>Full flowering</i> |
| 1                                     | Quercetin- <i>O</i> -sophorosid                    | 0.271 ± 0.026            | 0.055 ± 0.003 | ND                                   | ND                                   | ND                                   | ND                                  |
| 2                                     | Isoorientin-2''- <i>O</i> -glucoside               | 0.356 ± 0.019            | 0.088 ± 0.002 | 0.228 ± 0.010                        | 0.382 ± 0.013                        | 0.270 ± 0.005                        | 0.028*                              |
| 3                                     | Luteolin- <i>C</i> -glucoside                      | 0.113 ± 0.004            | 0.030 ± 0.001 | 0.114 ± 0.006                        | 0.141 ± 0.005                        | 0.079 ± 0.002                        | ND                                  |
| 4                                     | Luteolin- <i>C</i> -hexoside- <i>O</i> -rhamnoside | 0.193 ± 0.010            | 0.058 ± 0.001 | 0.159 ± 0.007                        | 0.223 ± 0.009                        | 0.142 ± 0.001                        | 0.029*                              |
| 5                                     | Kaempferol- <i>O</i> -sophorosid                   | 0.128 ± 0.008            | 0.028 ± 0.000 | ND                                   | ND                                   | ND                                   | ND                                  |
| 6                                     | Vitexin-2''- <i>O</i> -glucoside                   | 0.640 ± 0.025            | 0.210 ± 0.004 | 0.519 ± 0.023                        | 1.015 ± 0.008                        | 0.431 ± 0.006                        | 0.002*                              |
| 7                                     | Vitexin-2- <i>O</i> -rhamnoside *                  | 0.441 ± 0.013            | 0.221 ± 0.005 | 0.503 ± 0.014                        | 0.697 ± 0.012                        | 0.265 ± 0.006                        | 0.021*                              |
| 8                                     | Luteolin-7- <i>O</i> -glucuronid *                 | 2.175 ± 0.119            | 0.524 ± 0.003 | 2.674 ± 0.081                        | 2.390 ± 0.061                        | 1.485 ± 0.035                        | 0.396*                              |
| 9                                     | Apigenin-7- <i>O</i> -glucuronid *                 | 0.519 ± 0.011            | 0.265 ± 0.001 | 0.947 ± 0.017                        | 0.858 ± 0.000                        | 0.365 ± 0.012                        | 0.117 *                             |
| 10                                    | Chrysoeriol- <i>O</i> -glucuronid isomer 1         | 0.091 ± 0.001            | 0.054 ± 0.000 | 0.121 ± 0.004                        | 0.071 ± 0.002                        | 0.097 ± 0.001                        | ND                                  |
| 11                                    | Chrysoeriol- <i>O</i> -glucuronid isomer 2         | 0.105 ± 0.001            | 0.061 ± 0.000 | 0.115 ± 0.005                        | 0.157 ± 0.006                        |                                      | ND                                  |
| 12                                    | Apigenin-4'-methoxy-7-glucuronid                   | ND                       | ND            | 0.037 ± 0.002                        | 0.014 ± 0.000                        | 0.016 ± 0.001                        | 0.019*                              |
| 13                                    | Luteolin *                                         | 0.003 ± 0.004            | 0.053 ± 0.001 | ND                                   | ND                                   | ND                                   | ND                                  |
| 14                                    | Apigenin *                                         | 0.043 ± 0.002            | 0.033 ± 0.000 | ND                                   | ND                                   | ND                                   | ND                                  |
| 15                                    | Chrysoeriol *                                      | ND                       | ND            | ND                                   | ND                                   | ND                                   | ND                                  |
| Total amount of identified flavonoids |                                                    | 5.083                    | 1.685         | 5.424                                | 5.953                                | 3.154                                | 0.673*                              |

\* No standard deviation could be calculated; nd: not detected.





|                                       |               |      |      |      |      |      |      |      |      |      |      |
|---------------------------------------|---------------|------|------|------|------|------|------|------|------|------|------|
| 14                                    | Apigenin *    | nd   | nd   | nd   | nd   | nd   | nd   | nd   | nd   | nd   | nd   |
| 15                                    | Chrysoeriol * | nd   | nd   | nd   | nd   | nd   | nd   | nd   | nd   | nd   | nd   |
| Total amount of identified flavonoids |               | 5.71 | 1.89 | 0.30 | 5.92 | 3.49 | 1.48 | 1.49 | 4.01 | 3.49 | 1.63 |

---

nd: not detected.

**Table 10.** Flavonoid composition of *Santhica* 27 density 300 seeds/m<sup>2</sup> inflorescences. Data are presented as mean  $\pm$  SD in mg/g DW.

| No.                                   | Attempted identification                           | 22.07.2019             | 13.08.2019            | 27.08.2019            | 10.09.2019              |
|---------------------------------------|----------------------------------------------------|------------------------|-----------------------|-----------------------|-------------------------|
|                                       |                                                    | <i>Early flowering</i> | <i>Full flowering</i> | <i>Full flowering</i> | <i>End of flowering</i> |
| 1                                     | Quercetin- <i>O</i> -sophoroside                   | nd                     | nd                    | nd                    | nd                      |
| 2                                     | Isoorientin-2''- <i>O</i> -glucoside               | 0.175 $\pm$ 0.001      | 0.134 $\pm$ 0.000     | 0.000                 | 0.000                   |
| 3                                     | Luteolin- <i>C</i> -glucoside                      | 0.075 $\pm$ 0.000      | 0.031 $\pm$ 0.000     | 0.000                 | 0.000                   |
| 4                                     | Luteolin- <i>C</i> -hexoside- <i>O</i> -rhamnoside | 0.228 $\pm$ 0.001      | 0.155 $\pm$ 0.000     | 0.004 $\pm$ 0.001     | 0.004 $\pm$ 0.000       |
| 5                                     | Kaempferol- <i>O</i> -sophoroside                  | nd                     | nd                    | nd                    | nd                      |
| 6                                     | Vitexin-2''- <i>O</i> -glucoside                   | 0.232 $\pm$ 0.001      | 0.154 $\pm$ 0.001     | 0.000                 | 0.000                   |
| 7                                     | Vitexin-2- <i>O</i> -rhamnoside *                  | 0.528 $\pm$ 0.002      | 0.250 $\pm$ 0.001     | 0.000                 | 0.000                   |
| 8                                     | Luteolin-7- <i>O</i> -glucuronide *                | 1.896 $\pm$ 0.021      | 1.216 $\pm$ 0.080     | 0.061 $\pm$ 0.010     | 0.060 $\pm$ 0.005       |
| 9                                     | Apigenin-7- <i>O</i> -glucuronide *                | 0.688 $\pm$ 0.001      | 0.256 $\pm$ 0.004     | 0.056 $\pm$ 0.012     | 0.094 $\pm$ 0.012       |
| 10                                    | Chrysoeriol- <i>O</i> -glucuronide isomer 1        | 0.077 $\pm$ 0.012      | 0.039 $\pm$ 0.002     | 0.016 $\pm$ 0.000     | 0.024 $\pm$ 0.000       |
| 11                                    | Chrysoeriol- <i>O</i> -glucuronide isomer 2        | nd                     | nd                    | nd                    | nd                      |
| 12                                    | Apigenin-4'-methoxy-7-glucuronide                  | 0.065 $\pm$ 0.003      | 0.026 $\pm$ 0.000     | 0.004 $\pm$ 0.001     | 0.004 $\pm$ 0.003       |
| 13                                    | Luteolin *                                         | nd                     | nd                    | nd                    | nd                      |
| 14                                    | Apigenin *                                         | nd                     | nd                    | nd                    | nd                      |
| 15                                    | Chrysoeriol *                                      | nd                     | nd                    | nd                    | nd                      |
| Total amount of identified flavonoids |                                                    | 3.97                   | 2.26                  | 0.14                  | 0.19                    |

nd: not detected.

**Table 11.** Flavonoid composition of Futura 75 density 300 and 150 seeds/m<sup>2</sup> inflorescences. Data are presented as mean  $\pm$  SD in mg/g DW.

| No                                    | Attempted identification                           | Density 150                |                            |                           |                             | Density 300                |                            |                             |
|---------------------------------------|----------------------------------------------------|----------------------------|----------------------------|---------------------------|-----------------------------|----------------------------|----------------------------|-----------------------------|
|                                       |                                                    | 22.07.2019                 | 13.08.2019                 | 27.08.2019                | 10.09.2019                  | 22.07.2019                 | 13.08.2019                 | 10.09.2019                  |
|                                       |                                                    | <i>Early<br/>flowering</i> | <i>Early<br/>flowering</i> | <i>Full<br/>flowering</i> | <i>End of<br/>flowering</i> | <i>Early<br/>flowering</i> | <i>Early<br/>flowering</i> | <i>End of<br/>flowering</i> |
| 1                                     | Quercetin- <i>O</i> -sophoroside                   | nd                         | 0.014 $\pm$ 0.002          | nd                        | nd                          | nd                         | nd                         | nd                          |
| 2                                     | Isoorientin-2''- <i>O</i> -glucoside               | 0.036 $\pm$ 0.004          | 0.105 $\pm$ 0.008          | 0.191 $\pm$ 0.001         | 0.177 $\pm$ 0.000           | 0.175 $\pm$ 0.000          | 0.007 $\pm$ 0.001          | 0.060 $\pm$ 0.003           |
| 3                                     | Luteolin- <i>C</i> -glucoside                      | 0.031 $\pm$ 0.003          | 0.034 $\pm$ 0.002          | 0.008 $\pm$ 0.020         | 0.022 $\pm$ 0.002           | 0.055 $\pm$ 0.000          | 0.001 $\pm$ 0.000          | 0.009 $\pm$ 0.002           |
| 4                                     | Luteolin- <i>C</i> -hexoside- <i>O</i> -rhamnoside | 0.087 $\pm$ 0.008          | 0.103 $\pm$ 0.005          | 0.132 $\pm$ 0.013         | 0.124 $\pm$ 0.003           | 0.164 $\pm$ 0.001          | 0.007 $\pm$ 0.001          | 0.040 $\pm$ 0.001           |
| 5                                     | Kaempferol- <i>O</i> -sophoroside                  | nd                         | 0.019 $\pm$ 0.003          | nd                        | nd                          | nd                         | nd                         | nd                          |
| 6                                     | Vitexin-2''- <i>O</i> -glucoside                   | 0.000                      | 0.105 $\pm$ 0.010          | 0.273 $\pm$ 0.008         | 0.166 $\pm$ 0.005           | 0.304 $\pm$ 0.012          | 0.079 $\pm$ 0.006          | 0.061 $\pm$ 0.007           |
| 7                                     | Vitexin-2- <i>O</i> -rhamnoside *                  | 0.178 $\pm$ 0.017          | 0.152 $\pm$ 0.014          | 0.171 $\pm$ 0.005         | 0.099 $\pm$ 0.003           | 0.382 $\pm$ 0.002          | 0.122 $\pm$ 0.004          | 0.055 $\pm$ 0.012           |
| 8                                     | Luteolin-7- <i>O</i> -glucuronide *                | 1.915 $\pm$ 0.204          | 1.116 $\pm$ 0.079          | 1.404 $\pm$ 0.195         | 1.220 $\pm$ 0.135           | 2.049 $\pm$ 0.056          | 0.160 $\pm$ 0.008          | 0.578 $\pm$ 0.011           |
| 9                                     | Apigenin-7- <i>O</i> -glucuronide *                | 0.766 $\pm$ 0.047          | 0.261 $\pm$ 0.033          | 0.334 $\pm$ 0.022         | 0.203 $\pm$ 0.008           | 0.780 $\pm$ 0.002          | 0.313 $\pm$ 0.011          | 0.240 $\pm$ 0.014           |
| 10                                    | Chrysoeriol- <i>O</i> -glucuronide isomer 1        | 0.064 $\pm$ 0.004          | 0.036 $\pm$ 0.003          | 0.038 $\pm$ 0.001         | 0.032 $\pm$ 0.000           | 0.060 $\pm$ 0.000          | 0.027 $\pm$ 0.000          | 0.028 $\pm$ 0.001           |
| 11                                    | Chrysoeriol- <i>O</i> -glucuronide isomer 2        | 0.191 $\pm$ 0.009          | 0.065 $\pm$ 0.004          | 0.067 $\pm$ 0.000         | 0.045 $\pm$ 0.000           | 0.105 $\pm$ 0.000          | 0.042 $\pm$ 0.000          | 0.056 $\pm$ 0.003           |
| 12                                    | Apigenin-4'-methoxy-7-glucuronide                  | nd                         | nd                         | nd                        | nd                          | nd                         | nd                         | nd                          |
| 13                                    | Luteolin *                                         | nd                         | 0.039 $\pm$ 0.002          | nd                        | nd                          | nd                         | nd                         | nd                          |
| 14                                    | Apigenin *                                         | nd                         | 0.018 $\pm$ 0.001          | nd                        | nd                          | nd                         | nd                         | nd                          |
| 15                                    | Chrysoeriol *                                      | nd                         | nd                         | nd                        | nd                          | nd                         | nd                         | nd                          |
| Total amount of identified flavonoids |                                                    | 3.27                       | 2.07                       | 2.62                      | 2.09                        | 4.07                       | 0.76                       | 1.13                        |

nd: not detected.

**Table 12.** Flavonoid composition of *Santhica* 70 density 300 seeds/m<sup>2</sup> inflorescences. Data are presented as mean  $\pm$  SD in mg/g DW.

| No.                                   | Attempted identification                           | 22.07.2019             | 13.08.2019            | 10.09.2019              |
|---------------------------------------|----------------------------------------------------|------------------------|-----------------------|-------------------------|
|                                       |                                                    | <i>Early flowering</i> | <i>Full flowering</i> | <i>End of flowering</i> |
| 1                                     | Quercetin- <i>O</i> -sophoroside                   | nd                     | nd                    | nd                      |
| 2                                     | Isoorientin-2''- <i>O</i> -glucoside               | 0.252 $\pm$ 0.006      | 0.013 $\pm$ 0.000     | 0.000                   |
| 3                                     | Luteolin- <i>C</i> -glucoside                      | 0.075 $\pm$ 0.003      | 0.004 $\pm$ 0.000     | 0.000                   |
| 4                                     | Luteolin- <i>C</i> -hexoside- <i>O</i> -rhamnoside | 0.282 $\pm$ 0.007      | 0.027 $\pm$ 0.001     | 0.000                   |
| 5                                     | Kaempferol- <i>O</i> -sophoroside                  | nd                     | nd                    | nd                      |
| 6                                     | Vitexin-2''- <i>O</i> -glucoside                   | 0.406 $\pm$ 0.002      | 0.000                 | 0.000                   |
| 7                                     | Vitexin-2- <i>O</i> -rhamnoside *                  | 0.596 $\pm$ 0.014      | 0.071 $\pm$ 0.000     | 0.000                   |
| 8                                     | Luteolin-7- <i>O</i> -glucuronide *                | 2.474 $\pm$ 0.050      | 0.306 $\pm$ 0.023     | 0.005 $\pm$ 0.009       |
| 9                                     | Apigenin-7- <i>O</i> -glucuronide *                | 0.648 $\pm$ 0.016      | 0.160 $\pm$ 0.000     | 0.033 $\pm$ 0.018       |
| 10                                    | Chrysoeriol- <i>O</i> -glucuronide isomer 1        | 0.073 $\pm$ 0.005      | 0.023 $\pm$ 0.001     | 0.013 $\pm$ 0.001       |
| 11                                    | Chrysoeriol- <i>O</i> -glucuronide isomer 2        | nd                     | nd                    | nd                      |
| 12                                    | Apigenin-4'-methoxy-7-glucuronide                  | 0.036 $\pm$ 0.001      | 0.010 $\pm$ 0.001     | 0.005 $\pm$ 0.000       |
| 13                                    | Luteolin *                                         | nd                     | nd                    | nd                      |
| 14                                    | Apigenin *                                         | nd                     | nd                    | nd                      |
| 15                                    | Chrysoeriol *                                      | nd                     | nd                    | nd                      |
| Total amount of identified flavonoids |                                                    | 4.84                   | 0.61                  | 0.06                    |

**Table 13.** Flavonoid composition of Finola density 300 and 150 seeds/m<sup>2</sup>, male and female inflorescences. Data are presented as mean ± SD in mg/g DW.

| No.                                   | Attempted identification                           | Density 150   |                                     |                                       |                                       |                                       |                                       | Density 300 |
|---------------------------------------|----------------------------------------------------|---------------|-------------------------------------|---------------------------------------|---------------------------------------|---------------------------------------|---------------------------------------|-------------|
|                                       |                                                    | Male flowers  |                                     | Female flowers                        |                                       |                                       |                                       |             |
|                                       |                                                    | 02.07.2019    | 02.07.2019<br><i>Full flowering</i> | 16.07.2019<br><i>End of flowering</i> | 30.07.2019<br><i>End of flowering</i> | 11.08.2019<br><i>End of flowering</i> | 11.08.2019<br><i>End of flowering</i> |             |
| 1                                     | Quercetin- <i>O</i> -sophorosid                    | 0.059 ± 0.004 | nd                                  | nd                                    | nd                                    | nd                                    | nd                                    |             |
| 2                                     | Isoorientin-2''- <i>O</i> -glucoside               | 0.172 ± 0.003 | 0.205 ± 0.008                       | 0.129 ± 0.001                         | 0.089 ± 0.002                         | 0.059 ± 0.002                         | 0.025 ± 0.002                         |             |
| 3                                     | Luteolin- <i>C</i> -glucoside                      | 0.049 ± 0.001 | 0.117 ± 0.000                       | 0.052 ± 0.000                         | 0.028 ± 0.001                         | 0.008 ± 0.000                         | 0.012 ± 0.001                         |             |
| 4                                     | Luteolin- <i>C</i> -hexoside- <i>O</i> -rhamnoside | 0.149 ± 0.001 | 0.182 ± 0.003                       | 0.109 ± 0.001                         | 0.072 ± 0.003                         | 0.054 ± 0.001                         | 0.030 ± 0.002                         |             |
| 5                                     | Kaempferol- <i>O</i> -sophorosid                   | 0.033 ± 0.001 | Nd                                  | Nd                                    | Nd                                    | Nd                                    | nd                                    |             |
| 6                                     | Vitexin-2''- <i>O</i> -glucoside                   | 0.125 ± 0.005 | 0.167 ± 0.006                       | 0.093 ± 0.001                         | 0.011 ± 0.002                         | Nd                                    | Nd                                    |             |
| 7                                     | Vitexin-2- <i>O</i> -rhamnoside *                  | 0.126 ± 0.004 | 0.250 ± 0.015                       | 0.101 ± 0.026                         | 0.017 ± 0.004                         | Nd                                    | Nd                                    |             |
| 8                                     | Luteolin-7- <i>O</i> -glucuronid *                 | 1.019 ± 0.005 | 1.416 ± 0.007                       | 1.035 ± 0.008                         | 0.630 ± 0.046                         | 0.322 ± 0.063                         | 0.165 ± 0.013                         |             |
| 9                                     | Apigenin-7- <i>O</i> -glucuronid *                 | 0.131 ± 0.002 | 0.257 ± 0.002                       | 0.175 ± 0.002                         | 0.078 ± 0.004                         | 0.019 ± 0.002                         | 0.050 ± 0.005                         |             |
| 10                                    | Chrysoeriol- <i>O</i> -glucuronid isomer 1         | 0.069 ± 0.002 | 0.059 ± 0.000                       | 0.049 ± 0.001                         | 0.033 ± 0.005                         | 0.021 ± 0.001                         | 0.031 ± 0.001                         |             |
| 11                                    | Chrysoeriol- <i>O</i> -glucuronid isomer 2         | nd            | nd                                  | nd                                    | nd                                    | nd                                    | nd                                    |             |
| 12                                    | Apigenin-4'-methoxy-7-glucuronid                   | nd            | nd                                  | nd                                    | nd                                    | nd                                    | nd                                    |             |
| 13                                    | Luteolin *                                         | nd            | nd                                  | nd                                    | nd                                    | nd                                    | nd                                    |             |
| 14                                    | Apigenin *                                         | nd            | nd                                  | nd                                    | nd                                    | nd                                    | nd                                    |             |
| 15                                    | Chrysoeriol *                                      | nd            | nd                                  | nd                                    | nd                                    | nd                                    | nd                                    |             |
| Total amount of identified flavonoids |                                                    | 1.931         | 2.654                               | 1.742                                 | 0.958                                 | 2.351                                 | 0.263                                 |             |

**Table 14.** Qualitative analysis of the different terpenes found in 8 different hemp varieties.

| Cultivar, sowing density, harvest date           | Terpenes              |                           |                          |                      |                                 |                           |                       |                         |                                |                               |                              |                               |                      |                          |                       |                              |                                    |                                     |                         |                             |                                 |                            |                             |                             |                            |                                   |           |                                 |                              |     |
|--------------------------------------------------|-----------------------|---------------------------|--------------------------|----------------------|---------------------------------|---------------------------|-----------------------|-------------------------|--------------------------------|-------------------------------|------------------------------|-------------------------------|----------------------|--------------------------|-----------------------|------------------------------|------------------------------------|-------------------------------------|-------------------------|-----------------------------|---------------------------------|----------------------------|-----------------------------|-----------------------------|----------------------------|-----------------------------------|-----------|---------------------------------|------------------------------|-----|
|                                                  | Camphene <sup>a</sup> | alpha-Pinene <sup>b</sup> | beta-Pinene <sup>b</sup> | 3-Caren <sup>b</sup> | alpha-Phellandrene <sup>b</sup> | beta-Myrcene <sup>b</sup> | Limonene <sup>b</sup> | Eucalyptol <sup>b</sup> | beta-Phellandrene <sup>a</sup> | (Z)-beta-Ocimene <sup>b</sup> | gamma-Terpinene <sup>b</sup> | (E)-beta-Ocimene <sup>b</sup> | 4-Cymen <sup>b</sup> | Terpinolene <sup>b</sup> | Linolool <sup>b</sup> | alpha-Santalene <sup>a</sup> | (E)-alpha-Bergamotene <sup>a</sup> | (E)-beta-Caryophyllene <sup>b</sup> | 9-epi-(E)-Caryophyllene | alpha-Humulene <sup>b</sup> | (E)-beta-Farnesene <sup>a</sup> | beta-Selinene <sup>a</sup> | alpha-Selinene <sup>a</sup> | gamma-Cadinene <sup>a</sup> | beta-Maaliene <sup>a</sup> | Selina-3,7(11)-diene <sup>a</sup> | beta-(E)- | Humulen-1,2-epoxid <sup>a</sup> | alpha-Bisabolol <sup>b</sup> |     |
| Fedora 17 150, 27.08.19 (end of flowering)       | +++                   | ++                        | +++                      | +++                  | ++                              | ++                        | ++                    | ++                      | ++                             | ++                            | ++                           | ++                            | ++                   | ++                       | +                     | ++                           | ++                                 | ++                                  | +                       | ++                          | ++                              | ++                         | ++                          | ++                          | ++                         | ++                                | ++        | ++                              | ++                           | ++  |
| Santhica 70 300, 10.09.19 (end of flowering)     | ++                    | +++                       | +++                      | ++                   | ++                              | +++                       | +++                   | +++                     | ++                             | ++                            | +++                          | ++                            | ++                   | ++                       | +                     | ++                           | +++                                | +++                                 | ++                      | ++                          | +++                             | +++                        | +++                         | ++                          | ++                         | +++                               | +++       | +++                             | +++                          | ++  |
| Finola 150, 11.08.19 (end of flowering)          | +++                   | +++                       | +++                      | +++                  | ++                              | +++                       | +++                   | +++                     | +++                            | +++                           | ++                           | +++                           | ++                   | +++                      | +                     | +++                          | +++                                | +++                                 | ++                      | +++                         | +++                             | ++                         | ++                          | ++                          | ++                         | ++                                | +++       | +++                             | +++                          | +++ |
| Fibror 79 150, 27.08.19 (end of early flowering) | +++                   | +++                       | +++                      | +++                  | ±                               | +++                       | +++                   | +++                     | +++                            | +++                           | ++                           | +++                           | +++                  | +++                      | ++                    | +++                          | +++                                | +++                                 | +++                     | ++                          | +++                             | +++                        | +++                         | +++                         | +++                        | +++                               | +++       | +++                             | +++                          | +++ |
| Felina 32 150, 27.08.19 (end of flowering)       | +++                   | +++                       | +++                      | +++                  | +++                             | +++                       | +++                   | +++                     | +++                            | +++                           | +++                          | +++                           | +++                  | +++                      | ++                    | +++                          | +++                                | +++                                 | +++                     | +++                         | +++                             | +++                        | +++                         | +++                         | +++                        | +++                               | +++       | +++                             | +++                          | +++ |
| Santhica 27 300, 10.09.19 (end of flowering)     | ++                    | +++                       | +++                      | ++                   | ++                              | +++                       | +++                   | +++                     | ++                             | +++                           | +++                          | ++                            | +++                  | +++                      | +                     | +++                          | +++                                | +++                                 | ++                      | +++                         | +++                             | +++                        | +++                         | +++                         | +++                        | +++                               | +++       | +++                             | +++                          | +++ |
| Futura 75 150, 27.08.19 (full flowering)         | +++                   | +++                       | +++                      | +++                  | +++                             | +++                       | +++                   | +++                     | +++                            | +++                           | +++                          | +++                           | +++                  | +++                      | ++                    | +++                          | +++                                | +++                                 | +++                     | +++                         | +++                             | +++                        | +++                         | +++                         | +++                        | +++                               | +++       | +++                             | +++                          | +++ |
| KC Virtus ♂ 300, 27.08.19                        | ±                     | +++                       | +++                      | ±                    | ±                               | +++                       | +++                   | +++                     | +++                            | ++                            | ±                            | +++                           | ±                    | +++                      | ±                     | ++                           | ±                                  | +++                                 | ±                       | +++                         | ±                               | +++                        | ++                          | ±                           | +++                        | ±                                 | +++       | +++                             | +++                          | +++ |

|                                                           |     |     |     |     |    |     |     |     |    |     |     |     |   |    |     |     |     |     |     |    |     |     |     |     |     |     |     |
|-----------------------------------------------------------|-----|-----|-----|-----|----|-----|-----|-----|----|-----|-----|-----|---|----|-----|-----|-----|-----|-----|----|-----|-----|-----|-----|-----|-----|-----|
| KC Virtus 300, 27.08.19 ( <i>end of early flowering</i> ) | +++ | +++ | +++ | +++ | ++ | +++ | +++ | +++ | ++ | +++ | +++ | +++ | + | ++ | +++ | +++ | +++ | +++ | +++ | ++ | +++ | +++ | +++ | +++ | +++ | +++ | +++ |
|                                                           | +   | +   |     |     |    | ++  | +   |     |    |     |     |     | + |    |     | +   |     |     |     |    |     |     |     |     |     |     |     |

<sup>a</sup> Compound identified by mass and retention index, not verified with reference standard.

<sup>b</sup> Compound identified by mass and retention index, and verified with reference standard.

++++, +++, ++, +, ± relative amount of each compounds in the sample calculated using the formula  $n+ = \log(A_{Scan\ 35.250\ AMU}) - 4$ .

**Table 15.** Terpene composition of different hemp cultivars sowed at different densities and harvested at different dates. Data are expressed as mean ± SD in mg/kg FW, flowering stages are indicated by the letters: a = early flowering, b = full flowering, c = end of flowering.

| Cultivar, sowing density                                                                          | Harvest date and flowering stage | <i>alpha-Pinene</i> | <i>beta-Pinene</i> | Myrcene      | Limonene   | <i>beta-Phellandrene</i> | (Z)-Ocimene | (E)-Ocimene | Eucalyptol | <i>gamma-Terpinene</i> | Terpinolene | Linalool  | <i>beta-Caryophyllene</i> | <i>alpha-Humulene</i> | <i>alpha-Bisabolol</i> | Sum   | Sum   | Sesquiterpenes | Sum Terpenes | Ratio | Mono/Sesquiterp |
|---------------------------------------------------------------------------------------------------|----------------------------------|---------------------|--------------------|--------------|------------|--------------------------|-------------|-------------|------------|------------------------|-------------|-----------|---------------------------|-----------------------|------------------------|-------|-------|----------------|--------------|-------|-----------------|
|                                                                                                   |                                  | Quantity (mg/kg)    |                    |              |            |                          |             |             |            |                        |             |           |                           |                       |                        |       |       |                |              |       |                 |
| Fedora 17 150                                                                                     | 22.07.2019 a                     | 50.8 ± 5.4          | 19.5 ± 1.5         | 17.1 ± 1.6   | 4.0 ± 0.5  | 5.6 ± 0.5                | 2.2 ± 0.5   | 16.9 ± 1.1  | 2.1 ± 0.5  | <0.5                   | 6.7 ± 1.1   | <0.5      | 220.3 ± 10.0              | 74.1 ± 3.6            | 6.6 ± 1.7              | 125.1 | 301.1 | 426            | 0.4          |       |                 |
|                                                                                                   | 13.08.2019 b                     | 110.2 ± 1.0         | 42.4 ± 4.9         | 111.7 ± 17.5 | 6.7 ± 1.4  | 8.7 ± 1.1                | 5.4 ± 0.9   | 78.7 ± 12.6 | 0.6 ± 0.3  | 1.8 ± 0.5              | 39.9 ± 4.5  | 0.9 ± 0.3 | 169.0 ± 3.6               | 61.2 ± 1.5            | 3.0 ± 0.3              | 407.0 | 233.2 | 640            | 1.7          |       |                 |
|                                                                                                   | 27.08.2019 c                     | 140.7 ± 0.5         | 53.0 ± 1.1         | 265.9 ± 31.7 | 13.6 ± 2.2 | 21.5 ± 1.6               | 9.1 ± 0.7   | 135.6 ± 9.3 | 1.0 ± 0.3  | 4.1 ± 0.5              | 168.8 ± 1.7 | 0.8 ± 0.2 | 182.2 ± 13.3              | 59.2 ± 2.7            | 5.8 ± 0.3              | 814.2 | 247.2 | 1061           | 3.3          |       |                 |
|                                                                                                   | 10.09.2019 c                     | 63.5 ± 1.2          | 24.4 ± 2.2         | 162.9 ± 5.6  | 6.2 ± 0.9  | 9.9 ± 0.7                | 3.9 ± 0.7   | 55.7 ± 3.9  | 0.9 ± 0.2  | 1.8 ± 0.3              | 53.5 ± 1.8  | 0.8 ± 0.2 | 62.0 ± 5.2                | 20.1 ± 1.6            | 5.2 ± 0.9              | 383.4 | 87.3  | 471            | 4.4          |       |                 |
| KC Virtus 150    | 22.07.2019 a                     | 39.1 ± 0.3          | 15.1 ± 2.4         | 27.8 ± 4.2   | 9.3 ± 0.5  | 10.0 ± 0.9               | 0.7 ± 0.3   | 4.5 ± 0.3   | 6.5 ± 0.3  | <0.5                   | <0.5        | <0.5      | 253.6 ± 64.0              | 79.0 ± 21.4           | 13.1 ± 0.3             | 114.6 | 345.7 | 460            | 0.3          |       |                 |
|                                                                                                   | 13.08.2019 a                     | 91.2 ± 0.5          | 49.2 ± 10.2        | 77.5 ± 19.3  | 23.1 ± 7.1 | 14.2 ± 2.7               | 1.3 ± 0.9   | 11.8 ± 3.5  | 3.4 ± 0.3  | 0.9 ± 0.2              | 7.2 ± 2.2   | <0.5      | 324.7 ± 62.5              | 106.3 ± 20.1          | 3.7 ± 0.2              | 280.5 | 434.6 | 715            | 0.6          |       |                 |
|                                                                                                   | 27.08.2019 a                     | 112.9 ± 0.5         | 52.1 ± 1.0         | 195.8 ± 30.9 | 22.6 ± 9.0 | 12.0 ± 1.7               | 2.6 ± 2.0   | 18.5 ± 2.7  | 2.3 ± 0.3  | 1.0 ± 0.5              | 42.1 ± 5.9  | 1.0 ± 0.6 | 166.2 ± 17.5              | 51.4 ± 4.8            | 4.7 ± 0.4              | 462.9 | 222.3 | 685            | 2.1          |       |                 |
|                                                                                                   | 10.09.2019 b                     | 127.4 ± 0.6         | 54.2 ± 3.8         | 214.7 ± 22.5 | 32.4 ± 1.4 | 9.6 ± 0.5                | 2.4 ± 0.3   | 34.5 ± 2.9  | 1.4 ± 0.3  | 0.7 ± 0.2              | 42.1 ± 4.4  | 2.5 ± 0.3 | 158.8 ± 23.8              | 49.1 ± 7.2            | 5.7 ± 0.5              | 521.9 | 213.6 | 735            | 2.4          |       |                 |
| Finola 150                                                                                        | 02.07.2019 b                     | 41.5 ± 10.7         | 19.9 ± 2.9         | 36.8 ± 0.6   | 10.2 ± 0.3 | 1.1 ± 0.3                | 2.2 ± 0.8   | 21.9 ± 0.6  | <0.5       | <0.5                   | 9.0 ± 0.6   | 0.6 ± 0.7 | 87.4 ± 6.7                | 27.0 ± 2.2            | 5.7 ± 1.4              | 144.0 | 120.1 | 264            | 1.2          |       |                 |
|                                                                                                   | 16.07.2019 c                     | 80.6 ± 4.0          | 35.2 ± 1.3         | 146.8 ± 13.9 | 16.8 ± 1.7 | 6.8 ± 0.5                | 3.6 ± 0.7   | 55.9 ± 5.9  | <0.5       | <0.5                   | 28.9 ± 5.5  | 0.6 ± 0.5 | 70.9 ± 2.9                | 21.6 ± 2.2            | 3.2 ± 0.3              | 376.3 | 95.7  | 472            | 3.9          |       |                 |
|                                                                                                   | 30.07.2019 c                     | 54.7 ± 3.3          | 22.6 ± 2.0         | 117.7 ± 11.2 | 10.9 ± 0.9 | 8.1 ± 0.7                | 3.9 ± 0.7   | 54.1 ± 6.3  | 0.8 ± 0.2  | 1.3 ± 0.4              | 46.9 ± 3.1  | <0.5      | 97.0 ± 4.7                | 29.8 ± 1.9            | 4.1 ± 0.3              | 321.6 | 131.0 | 453            | 2.5          |       |                 |
|                                                                                                   | 11.08.2019 c                     | 45.3 ± 1.1          | 18.9 ± 0.7         | 105.3 ± 2.7  | 5.0 ± 0.2  | 7.0 ± 0.3                | 4.8 ± 0.4   | 81.6 ± 2.1  | 0.7 ± 0.2  | 1.4 ± 0.3              | 50.5 ± 2.5  | 0.6 ± 0.5 | 58.8 ± 3.7                | 18.3 ± 1.3            | 5.6 ± 0.7              | 321.0 | 82.7  | 404            | 3.9          |       |                 |
| Santhica 70 150                                                                                   | 22.07.2019 a                     | 47.9 ± 0.3          | 14.0 ± 2.7         | 11.1 ± 1.1   | 3.3 ± 0.3  | 4.3 ± 0.2                | 1.6 ± 0.3   | 9.3 ± 1.0   | 3.6 ± 0.2  | <0.5                   | <0.5        | <0.5      | 183.7 ± 45.2              | 71.9 ± 18.3           | 5.7 ± 0.2              | 96.6  | 261.3 | 358            | 0.4          |       |                 |
|                                                                                                   | 13.08.2019 b                     | 30.6 ± 0.4          | 10.2 ± 0.3         | 32.8 ± 2.9   | 3.1 ± 0.7  | 5.5 ± 0.7                | 1.1 ± 0.5   | 19.6 ± 1.3  | 1.7 ± 0.3  | 1.1 ± 0.5              | 14.1 ± 0.2  | <0.5      | 133.0 ± 1.9               | 53.5 ± 1.5            | 4.0 ± 0.5              | 120.3 | 190.6 | 311            | 0.6          |       |                 |
|                                                                                                   | 10.09.2019 c                     | 19.5 ± 0.3          | 7.0 ± 1.0          | 63.4 ± 10.2  | 2.4 ± 0.5  | 4.7 ± 0.5                | 2.0 ± 0.6   | 22.5 ± 0.7  | 2.1 ± 0.4  | 1.0 ± 0.5              | 20.9 ± 3.1  | <0.5      | 73.3 ± 8.1                | 28.3 ± 2.4            | 2.8 ± 0.4              | 146.1 | 104.4 | 251            | 1.4          |       |                 |
| KC Virtus 150  | 13.08.2019                       | 49.6 ± 0.3          | 24.2 ± 0.2         | 94.4 ± 5.5   | 10.0 ± 1.2 | 12.1 ± 0.6               | 1.0 ± 0.3   | 4.2 ± 0.5   | 5.7 ± 0.2  | <0.5                   | 1.2 ± 0.5   | <0.5      | 125.3 ± 11.6              | 38.7 ± 2.8            | 5.2 ± 0.2              | 203.3 | 169.2 | 373            | 1.2          |       |                 |
